1 **Neocortical layer 4 in adult mouse differs in major cell types**  
2 **and circuit organization between primary sensory areas**

3

4 Scala F.<sup>#1,2</sup>, Kobak D.<sup>#3</sup>, Shan S.<sup>1,2</sup>, Bernaerts Y.<sup>3</sup>, Laternus S.<sup>3</sup>, Cadwell C.R.<sup>4</sup>, Hartmanis L.<sup>5</sup>,  
5 Froudarakis E.<sup>1,2</sup>, Castro J.<sup>1,2</sup>, Tan Z.H.<sup>1,2</sup>, Papadopoulos S.<sup>1,2</sup>, Patel S.<sup>1,2</sup>, Sandberg R.<sup>5</sup>,  
6 Berens P.<sup>3,6</sup>, Jiang X.<sup>\*1,2,7</sup>, Tolias A.S.<sup>\*1,2,8</sup>

7

8 <sup>1</sup> Department of Neuroscience, Baylor College of Medicine, Houston, TX, USA

9 <sup>2</sup> Center for Neuroscience and Artificial Intelligence, Baylor College of Medicine, Houston, Texas, USA

10 <sup>3</sup> Institute for Ophthalmic Research, University of Tübingen, Tübingen, Germany

11 <sup>4</sup> Department of Anatomic Pathology, University of California San Francisco, San Francisco, CA, USA

12 <sup>5</sup> Department of Cell and Molecular Biology, Karolinska Institutet, Stockholm, Sweden

13 <sup>6</sup> Department of Computer Science, University of Tübingen, Tübingen, Germany

14 <sup>7</sup> Jan and Dan Duncan Neurological Research Institute at Texas Children's Hospital, Houston, Texas, USA

15 <sup>8</sup> Department of Electrical and Computational Engineering, Rice University, Houston, Texas, USA

16

17 #Equally contributed

18 \*Corresponding authors: Andreas S. Tolias ([astolias@bcm.edu](mailto:astolias@bcm.edu)) and Xiaolong Jiang ([xiaolongj@bcm.edu](mailto:xiaolongj@bcm.edu))

19 **Abstract**

20 Layer 4 (L4) of mammalian neocortex plays a crucial role in cortical information processing, yet  
21 a complete census of its cell types and connectivity remains elusive. Using whole-cell  
22 recordings with morphological recovery, we identified one major excitatory and seven inhibitory  
23 types of neurons in L4 of adult mouse visual cortex (V1). Nearly all excitatory neurons were  
24 pyramidal and all somatostatin-positive (SOM<sup>+</sup>) non-fast-spiking neurons were Martinotti cells.  
25 In contrast, in somatosensory cortex (S1), excitatory neurons were mostly stellate and SOM<sup>+</sup>  
26 neurons were non-Martinotti. These morphologically distinct SOM<sup>+</sup> interneurons corresponded  
27 to different transcriptomic cell types and were differentially integrated into the local circuit with  
28 only S1 neurons receiving local excitatory input. We propose that cell-type specific circuit motifs,  
29 such as the Martinotti/pyramidal and non-Martinotti/stellate pairs, are optionally used across the  
30 cortex as building blocks to assemble cortical circuits.

## 31 **Main**

32 The mammalian sensory neocortex is organized as a six-layer structure. In this stereotypical  
33 architecture, layer 4 (L4) is the main target of sensory inputs coming from the thalamus, thus  
34 acting as the first level of cortical processing for sensory signals. Understanding how L4  
35 implements its computations requires to characterize the diversity of its constituent neuronal  
36 components and the connectivity among them.

37  
38 Most previous studies of L4 have focused on primary somatosensory cortex (S1) of young rats  
39 and mice. Spiny stellate cells have been reported to be the dominant excitatory cell type, both in  
40 rat <sup>1-5</sup> and in mouse <sup>6</sup> (as a result of sculpting of initially pyramidal neurons during development  
41 <sup>7,8</sup>). In contrast, inhibitory interneurons are highly diverse in terms of their genetic markers,  
42 morphologies and electrophysiological properties <sup>9</sup>. Previous studies have reported three types  
43 of fast-spiking (FS), parvalbumin-positive (PV<sup>+</sup>) interneurons <sup>10</sup> and five types of non-FS  
44 interneurons <sup>11</sup>, all of which have distinct morphologies. Several recent studies revealed that the  
45 somatostatin-positive (SOM<sup>+</sup>) interneurons form a single morphological population that has  
46 been called non-Martinotti cells <sup>12</sup> since their axons mainly target L4 <sup>13,14</sup>, in contrast to typical  
47 Martinotti cells, which target L1. Interneuron types exhibit type-specific connectivity patterns. For  
48 example, PV<sup>+</sup> FS interneurons receive strong thalamic inputs <sup>15-19</sup> while SOM<sup>+</sup> non-FS  
49 interneurons receive weaker inputs <sup>20,21</sup>. Both groups are reciprocally connected to local  
50 excitatory neurons and between each other <sup>10,14,16,18,22</sup>, but PV<sup>+</sup> inhibit each other while SOM<sup>+</sup> do  
51 not <sup>23</sup>.

52  
53 Since most of these detailed studies were performed in S1 of young animals, it is unclear  
54 whether the cellular components of L4 and their connectivity profile are the same in adult  
55 animals and in other cortical areas. Recent large-scale studies of transcriptomic cell types in

56 mouse and human cortex showed that most interneuron types are shared between cortical  
57 areas while the excitatory types are predominantly area-specific<sup>24,25</sup>. In line with this, it has  
58 been shown that excitatory cells in L4 of mouse and rat primary visual cortex (V1) are pyramidal  
59<sup>26,27</sup>, in contrast to L4 in S1. However, there has been no systematic comparisons of anatomical  
60 and electrophysiological properties as well as connectivity profiles between L4 of different  
61 cortical areas, leaving an open question about the similarity in their cellular components and  
62 circuitry.

63

64 To address this question, we compared the microcircuit organization of adult mouse V1 L4 with  
65 S1 L4. We performed a thorough census of the morphologically defined cell types in V1 L4 of  
66 adult mice (median age 71 days) using multi-cell simultaneous whole-cell recordings combined  
67 with *post-hoc* morphological recovery<sup>28</sup>. We identified several key differences in the cellular  
68 composition of L4 in V1 compared to the previous literature on S1, which we verified using  
69 targeted recordings of certain cell types in S1 L4 of similarly-aged mice. In addition, we mapped  
70 some of the observed morphological cell types to a reference transcriptomic cell type atlas<sup>24</sup>  
71 using Patch-seq<sup>29-31</sup>. We further investigated the local connectivity profiles in L4 of both V1 and  
72 S1, finding similarities as well as some important differences in their circuitry.

## 73 **Results**

### 74 **Morphologically defined cell types in L4 of adult mouse visual cortex**

75 We characterized the electrophysiological and morphological features of L4 neurons in V1 of  
76 adult mice ( $n=129$ , median age 71 days, interquartile range 62--85 days, full range 55--330  
77 days, Fig. S1) using whole-cell patch-clamp recordings combined with morphological recovery  
78 (see Methods). Altogether, we recovered and analyzed the morphology of  $n=1174$  neurons (578  
79 excitatory, 596 inhibitory).

80  
81 Out of the 578 excitatory cells, 573 (99.1%) were pyramidal neurons (PYR), characterized by  
82 apical dendrites extending into layer 1 (L1), consistent with previous reports in rats<sup>26</sup> and young  
83 mice<sup>27</sup>. These neurons did not show a complex arborization in L1, differing from typical layer 5  
84 (L5) pyramidal neurons which generally have a prominent tuft in L1<sup>32-34</sup> (Fig. 1a). Only five  
85 (0.9%) of the excitatory neurons were classified as spiny stellate cells based on the absence of  
86 the apical dendrites extending out of L4 to supragranular layers. These stellate cells had  
87 symmetrical non-polarized dendritic structure<sup>5</sup>. The prevalence of PYRs among excitatory  
88 neurons in L4 of V1 was further supported by the fact that all labeled neurons recorded in  
89 Scnn1a-Cre/Ai9 mice ( $n=5$ ), in which excitatory neurons in L4 are selectively labeled<sup>35,36</sup>, were  
90 morphologically confirmed as PYRs (100%, 30/30). In terms of electrophysiology, PYRs  
91 exhibited large action potential (AP) width, high AP amplitude, and shallow  
92 afterhyperpolarization (AHP) which clearly discriminate them from GABAergic interneurons (Fig.  
93 1b).

94  
95 Interneurons showed a greater variability in both morphological and electrophysiological  
96 features. We used *Viaat-Cre/Ai9* mice ( $n=47$ ) to target GABAergic interneurons<sup>28,37</sup>. Almost all  
97 labeled neurons recorded from these mice (95.5%, 234/245) were morphologically confirmed as

98 interneurons, with only a small fraction (4.5%) of them being PYRs. On the other hand, all  
99 unlabeled neurons ( $n=133$ ) were morphologically confirmed as excitatory neurons, suggesting  
100 that the entire population of interneurons in L4 was labeled in this Cre line. We identified seven  
101 GABAergic cells types (Fig. 1a) based on their morphology, following a widely used  
102 classification scheme based on the axonal geometry and projection patterns<sup>28,38–40</sup>: basket cells  
103 (BCs; 37.6%, 88/234), Martinotti cells (MCs; 20.1%, 47/234), bipolar cells (BPCs; 12.4%,  
104 29/234), neurogliaform cells (NGCs; 11.5%, 27/234), shrub cells (SCs; 9.4%, 22/234), double-  
105 bouquet cells (DBC; 5.6%, 13/234), and horizontally elongated cells (HECs; 3.4%, 8/234).  
106 These morphological types varied greatly in abundance and electrophysiological properties (Fig.  
107 1b).

108  
109 The most abundant interneuron type was BCs, with large somata and thick axons originating  
110 from the apical side and projecting towards L2/3; they exhibited a fast-spiking (FS) firing pattern  
111 with narrow AP width and high maximal firing rate. They were followed by MCs, characterized  
112 by an ascending axon that projected to L1 and by their large membrane time constant. BPCs  
113 had a small soma, dendrites extending to L1 and L5, an axon projecting mostly downward to L5,  
114 and an irregular firing pattern. NGCs were characterized by a very thin axon that highly ramified  
115 around the soma; they were late-spiking and had large AP width. The remaining three types  
116 were all FS: SCs had a thick axon branching locally around their soma; DBCs had a thick axon  
117 projecting towards L5 and upwards to L2/3; HECs had a thick axon spreading horizontally within  
118 L4. A more detailed description of morphological and electrophysiological properties of all  
119 interneuron types can be found in the Supplementary Information.

120

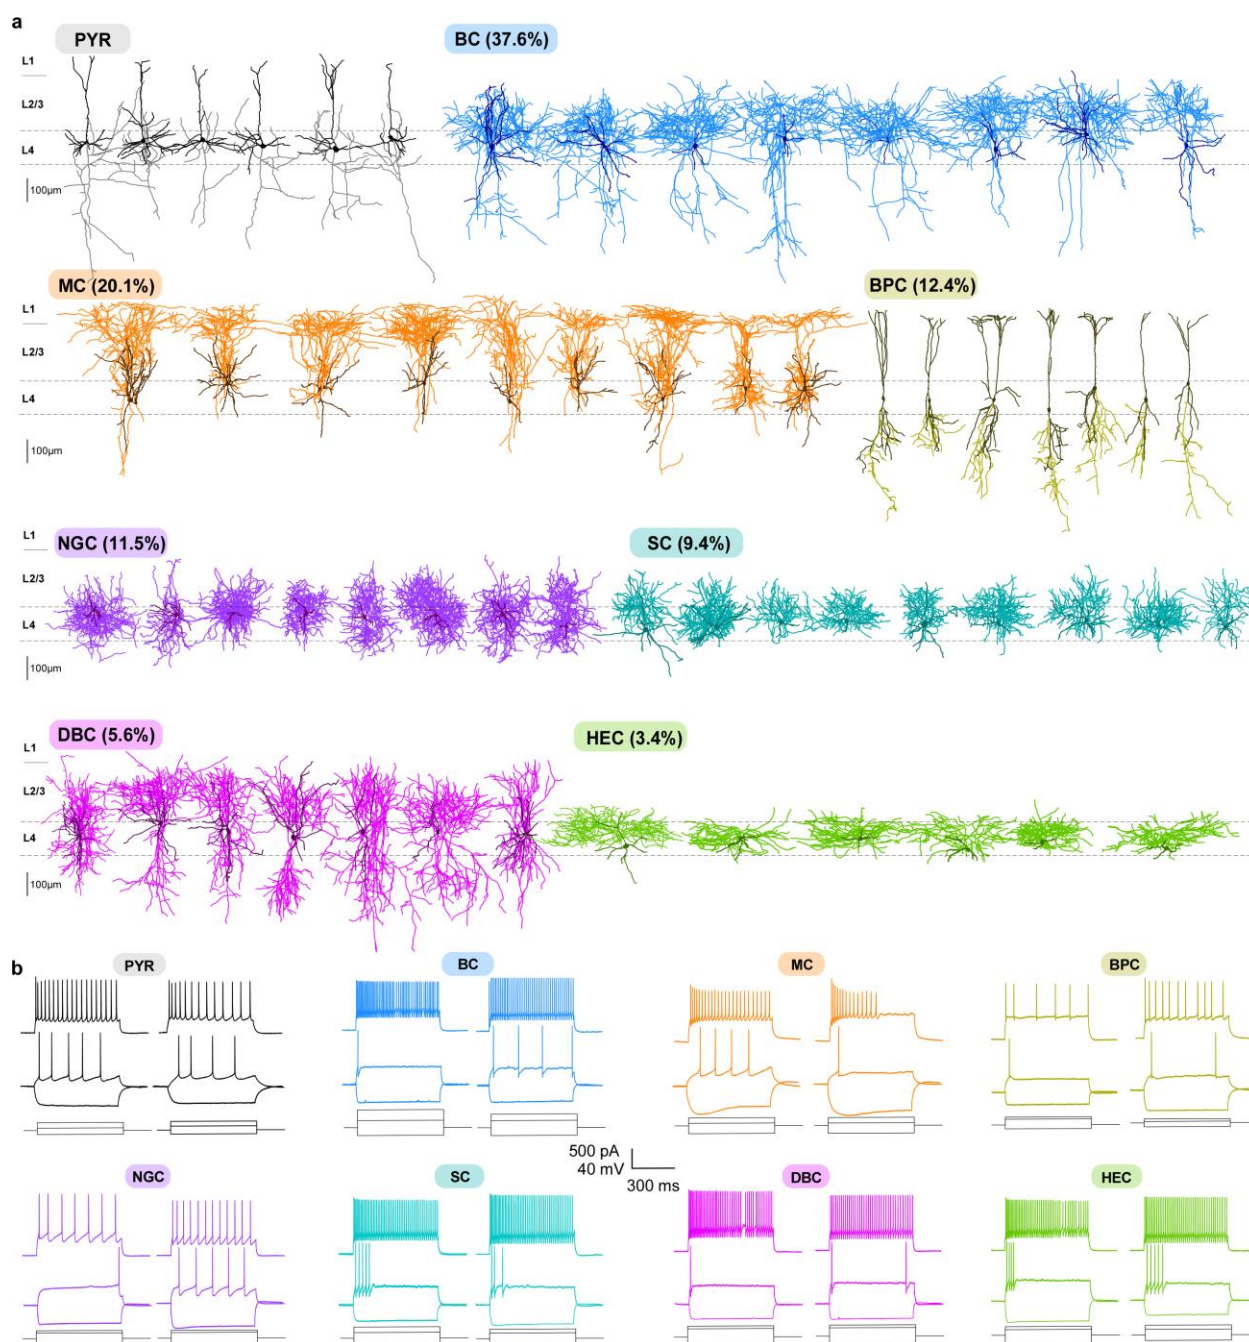

121

122 **Figure 1: Morphological cell types in V1 L4. (a)** Representative morphologies for each cell type. The  
123 dendrites are shown in a darker shade of color and the axons in a lighter shade. Types are sorted by  
124 abundance from high to low. Fractions indicate the proportion of inhibitory interneurons. PYR: pyramidal  
125 cells; BC: basket cells; MC: Martinotti cells, BPC: bipolar cells; NGC: neurogliaform cells, SC: shrub cells,

126 DBC: double-bouquet cells, HEC: horizontally elongated cells. **(b)** Spiking responses to step currents for  
127 two exemplary cells from each of the eight morphologically defined cell types.

128

---

129

130 We also performed experiments using several other Cre lines (parvalbumin-expressing, PV-  
131 Cre/Ai9,  $n=31$ ; somatostatin-expressing, SOM-Cre/Ai9,  $n=14$ ; and expressing vasointestinal  
132 peptide, VIP-Cre/Ai9,  $n=8$ ) to relate genetic markers with morphological cell types (Fig. S2). The  
133 majority of morphologically recovered PV-Cre<sup>+</sup> neurons were BCs (77.3%, 126/163 in PV-  
134 Cre/Ai9) and the rest were SCs (9.2%, 15/163), DBCs (12.3%, 20/163), and HECs (1.2%,  
135 2/163). The majority of SOM-Cre<sup>+</sup> neurons were typical MCs (91.8%, 56/61 in SOM-Cre/Ai9),  
136 while a small fraction exhibited an FS firing pattern and their morphological features matched  
137 those of BCs (8.2%, 5/61), in agreement with a previous report that due to potential off-target  
138 recombination, ~5--20% of neurons labeled in SOM-Cre line are FS<sup>28,41,42</sup> and PV<sup>+</sup>/SOM<sup>-</sup> at the  
139 protein level<sup>28,41</sup>. All VIP-Cre<sup>+</sup> neurons in V1 L4 were BPCs (100%, 26/26 in VIP-Cre/Ai9). We  
140 did not encounter any labeled NGCs in any of these three Cre lines.

141

142 To support our expert classification, we fully reconstructed a subset of neurons from each  
143 inhibitory type ( $n=92$  in total) and trained a regularized logistic regression classifier to  
144 discriminate between each pair of inhibitory cell types (see Methods). We used 2D density maps  
145 and a set of morphometric statistics (Fig. S3) as predictors<sup>43</sup>. Across all 21 pairs, the average  
146 cross-validated classification accuracy was 0.92, with most pairs discriminated almost perfectly  
147 (Fig. 2a, left). However, SC/HEC and SC/NGC pairs showed only ~0.65 classification accuracy.  
148 Visualisation of this dataset with t-SNE (Fig. 2a, right) indicated that SC/HEC and SC/NGC  
149 types were partially overlapping, as well as BC/DBC. Overall, this analysis suggests that while  
150 most morphological classes can be very well discriminated, some may be partially overlapping.



151 An important caveat is that low classification accuracy can also be due to an insufficient sample  
 152 size.

153

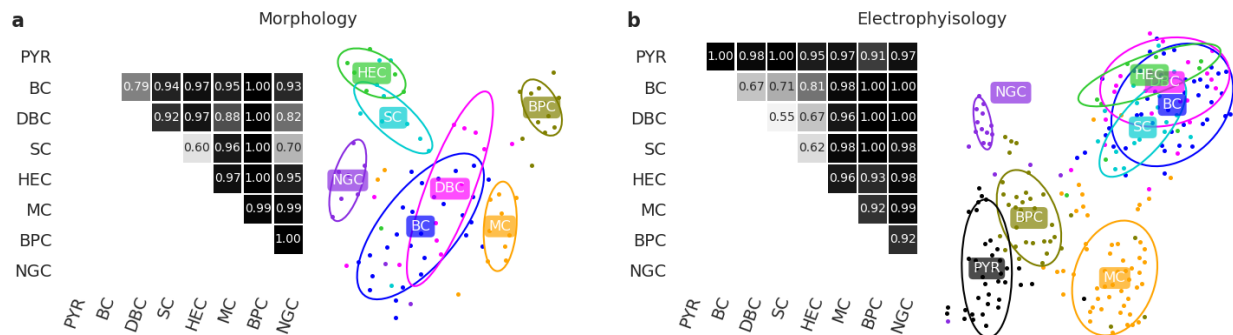

154

155 **Figure 2: Discriminability of morphologically defined cell types in V1 L4 using morphological and**  
 156 **electrophysiological properties. (a)** Cross-validated pairwise classification accuracy for each pair of  
 157 inhibitory cell types, using regularized logistic regression on a diverse set of morphological features. Total  
 158 sample size  $n=92$ . Right: 2D visualisation of the same  $n=92$  cells in the space of morphological features  
 159 using t-SNE. Ellipses show 80% coverage assuming 2D Gaussian distributions and using robust  
 160 estimates of the mean and the covariance (i.e. ellipses do not include outliers). **(b)** Cross-validated  
 161 pairwise classification accuracy for each pair of cell types, using electrophysiological features. Total  
 162 sample size  $n=235$ . Right: 2D visualisation of the same  $n=235$  cells in the space of electrophysiological  
 163 features using t-SNE.

164

165

166 To further explore variability in electrophysiological properties between cell types, we  
 167 characterized the firing pattern of a subset of neurons ( $n=235$ ) using 13 automatically extracted  
 168 electrophysiological features (Fig. S4). Most features exhibited strong differences between cell  
 169 types (Fig. S5). Two-dimensional visualisation of this dataset using t-SNE (Fig. 2b) showed that  
 170 all four PV<sup>+</sup> cell types overlapped in one group of electrophysiologically similar FS neurons,  
 171 while the other four types (PYR, NGC, BPC, and MC) each had distinct firing patterns. We  
 172 confirmed this using pairwise classification with regularized logistic regression (Fig. 2b): the

173 average cross-validated classification accuracy between the FS types was only 0.67, while the  
174 average accuracy across all other pairs was 0.98.

175

### 176 **V1 differs from S1 in major L4 cell types**

177 In contrast to V1 L4, stellate cells are known to be abundant in S1 L4 of rats and mice<sup>1-7</sup>. To  
178 confirm this, we recovered L4 excitatory cells in S1 ( $n=24$  mice, including  $n=5$  Scnna1-Cre/Ai9)  
179 with the same method as in V1. We found that indeed 76.6% (85/111) of the recovered spiny  
180 neurons did not have a clear apical dendrite and were thus classified as stellate cells (Fig. 3B),  
181 while the remaining 23.4% were pyramidal cells. This confirms that, unlike in V1, stellate cells  
182 are the predominant excitatory population in L4 of adult mouse S1 (Fisher's exact test for  
183 difference in the fraction of stellate cells between V1 and S1:  $p<0.0001$ ; 85/111 vs. 5/578).

184

185 Recent evidence indicates that most, if not all, L4 SOM<sup>+</sup> cells in mouse S1 are non-MC having  
186 axons mostly localized within L4, in stark contrast to typical MCs<sup>14</sup>. Indeed, we found that in S1,  
187 almost all L4 SOM-Cre<sup>+</sup> neurons we recovered (96.2%, 76/79, from  $n=19$  SOM-Cre/Ai9 mice)  
188 had non-MC morphology characterized by a thin, highly ramifying axon mostly residing within L4  
189 (Fig. 3B). Only two cells showed an ascending axon projecting to L1 typical of MCs (2.5%, 2/79)  
190 and one was characterized by a thick axon branching similarly to BC with a FS firing pattern  
191 (1.3%, 1/79) (Fisher's exact test for difference in the fraction of NMCs between S1 and V1:  
192  $p<0.0001$ ; 76/79 vs. 0/61). We follow the convention of a previous study<sup>12</sup> and refer to these  
193 SOM<sup>+</sup> neurons that dominate in L4 of S1 as non-Martinotti cells (NMCs).

194

195 The NMCs also differed in their firing pattern from MCs recorded in V1: they had a higher  
196 maximal firing rate, a lower AP width, and a lower membrane time constant (Fig. 4a and Fig.  
197 S5). This resembles the FS firing pattern, and one previous study called NMCs "quasi-FS"<sup>13</sup>.  
198 Comparison of electrophysiological features between MCs, NMCs, and FS cells revealed that

199 NMCs were “in between” MCs and FS cells in terms of their firing patterns and intrinsic  
200 membrane properties (Fig. S5, S6).

201  
202 To further investigate the differences between MCs in V1 and NMCs in S1, we used the Patch-  
203 seq<sup>29–31</sup> technique which combines patch-clamp recordings with single cell transcriptomics.  
204 Using  $n=6$  SOM-Cre/Ai9 mice, we sequenced RNA of SOM-Cre<sup>+</sup> neurons in L4 of V1 and S1  
205 ( $n=42$  in V1 and  $n=35$  in S1 after quality control), and also in L5 of each area ( $n=17$  and  $n=16$   
206 respectively). We obtained on average 1.1 million reads per cell (median; mean $\pm$ SD on a log<sub>10</sub>  
207 scale: 6.0 $\pm$ 0.3) and detected 6.4 $\pm$ 1.6 thousand (mean $\pm$ SD) genes per cell (Fig. S7). We  
208 mapped these cells to a large transcriptomic cell type dataset<sup>24</sup> that contained 21 somatostatin  
209 types with 2880 neurons from V1 and ALM. The quality of the mapping was equally good for V1  
210 and S1 cells (Fig. S7), suggesting that the V1+ALM dataset is a reasonable reference for S1  
211 interneurons. This is in agreement with the idea that inhibitory transcriptomic cell types are  
212 shared across cortical regions<sup>24,25</sup>. Three cells (excluded from the counts given above and from  
213 further analysis) had fast-spiking firing pattern, did not express SOM, and mapped to *Pvalb Reln*  
214 *Itm2a* transcriptomic type, likely corresponding to the basket cells that we found labeled in the  
215 SOM-Cre line (Fig. 3). All other cells mapped to *Sst* transcriptomic types.

216

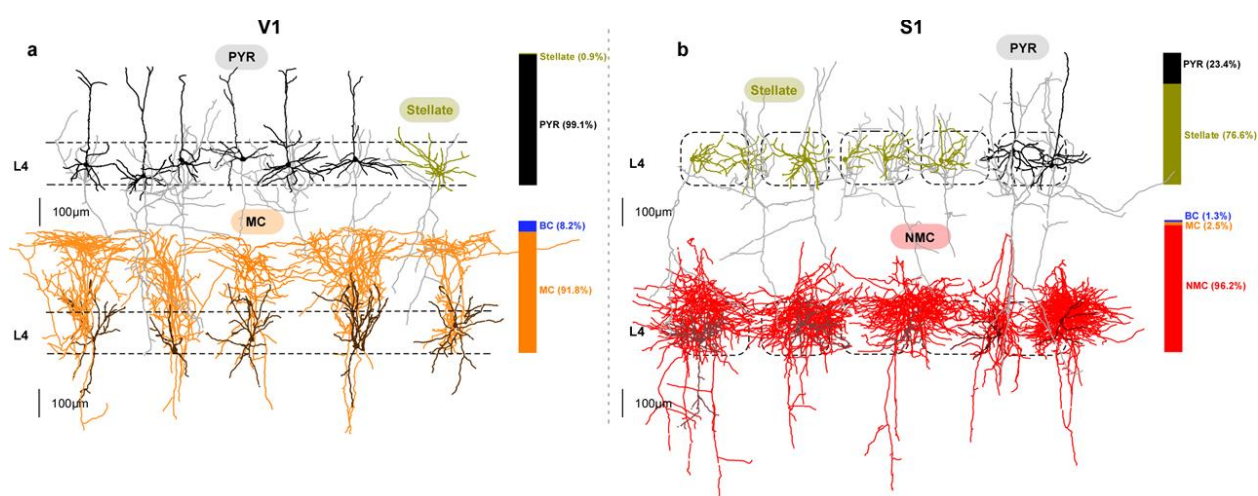

217

218 **Figure 3: V1 differs from S1 in excitatory cells and SOM<sup>+</sup> interneurons in L4. (a)** Representative  
219 morphologies of excitatory and SOM<sup>+</sup> neurons in V1 L4. Bar graphs indicate the fractions of each cell  
220 type among all morphologically recovered excitatory neurons (top) and all morphologically recovered  
221 SOM-Cre<sup>+</sup> neurons (bottom). **(b)** The same in S1 L4. Dashed rectangles represent individual cortical  
222 barrels.

223 

---

224

225 Most L4 cells (81%, 62/77) were assigned to one of the two transcriptomic types: *Sst Calb2*  
226 *Pdlim* and *Sst Hpse Cbln4* (Fig. 4B,E), with S1 cells falling almost exclusively into the *Hpse* type  
227 (27/29) and V1 cells falling preferentially into the *Calb2* type (21/33) ( $p < 0.0001$ , Fisher's exact  
228 test). This suggests that *Sst Calb2 Pdlim* is a MC type, in agreement with the conclusions of  
229 Tasic et al.<sup>24</sup> based on the data from Paul et al.<sup>44</sup>, and that *Sst Hpse Cbln4* is a NMC type, in  
230 agreement with Naka et al.<sup>45</sup>. However, this raises the question of why some V1 L4 SOM<sup>+</sup> cells,  
231 none of which had a NMC morphology (see above), had a NMC transcriptomic profile, both  
232 among our Patch-seq cells and in the Tasic et al. dataset<sup>24</sup>.

233

234 To answer this question, we looked at electrophysiological features that were most different  
235 between SOM<sup>+</sup> interneurons in V1 and S1 (Cohen's  $d > 1$ : input resistance, membrane time  
236 constant, maximum firing rate, and AP width) and found that for two of them (input resistance  
237 and membrane time constant) V1 cells belonging to the *Hpse* type had values more similar to  
238 the S1 cells than to the V1 cells from the *Calb2* type (Fig. 4d). This suggests that  
239 electrophysiologically, V1 *Hpse* MC cells are in between V1 *Calb2* MC cells and S1 NMC cells.

240

241 The relationship between gene expression and electrophysiological features can be visualized  
242 using the sparse reduced-rank regression analysis that we have recently introduced<sup>46</sup>. This  
243 technique aims to reconstruct all the electrophysiological features using a two-dimensional

244 projection of the expression levels of a small set of genes (Fig. 4d). The optimal number of  
 245 genes was found using cross-validation (see Methods). This analysis supports our conclusion  
 246 that V1 *Hpse* MCs are “in between” *Calb2* MCs and NMCs in terms of electrophysiology.  
 247 Interestingly, this analysis also showed that some of the cells assigned to the *Tac1* and *Mme*  
 248 types had a distinct fast-spiking-like firing pattern which was different from firing patterns of MCs  
 249 and NMCs (but was not as sustained as the proper FS pattern). These three SOM<sup>+</sup>  
 250 transcriptomic cell types have recently been identified in Tasic et al. <sup>24</sup>, and do not have known  
 251 morphological or electrophysiological counterparts.

252

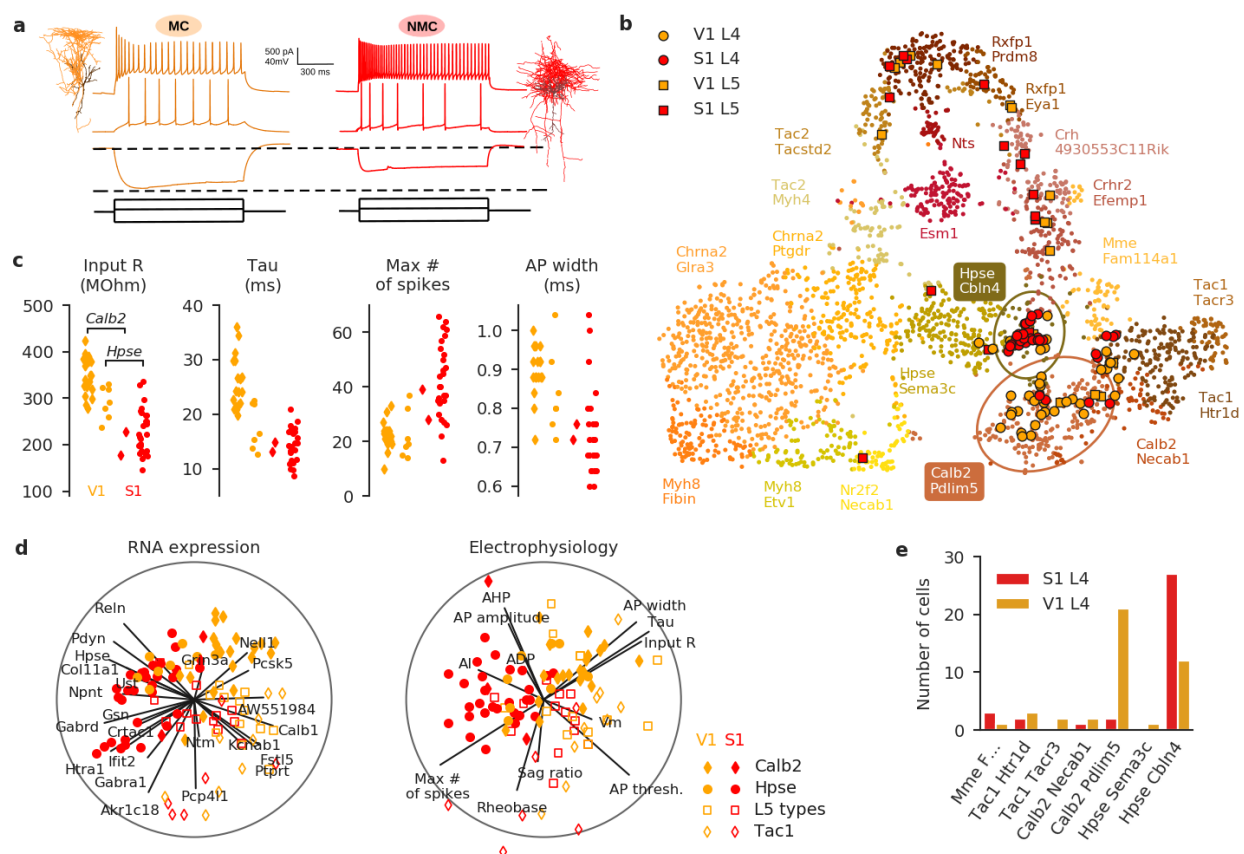

253  
 254 **Figure 4: SOM<sup>+</sup> interneurons in L4 of V1 and S1 differ in electrophysiological properties and**  
 255 **transcriptomic profile, as shown by Patch-seq. (a) Morphologies and firing patterns of two exemplary**  
 256 **cells, from V1 (orange) and S1 (red) respectively. (b) Mapping of the Patch-seq cells ( $n=110$ ) to the t-SNE**

257 visualization of the transcriptomic diversity among *Sst* types from Tasic et al.<sup>24</sup> t-SNE was done on all  
258 cells from *Sst* types except for *Sst Chodl* that is very well separated from the rest (20 clusters;  $n=2701$   
259 cells), using 500 most variable genes (see Methods). Two ellipses show 90% coverage areas of the two  
260 types where the most Patch-seq cells land. Mapping to t-SNE was performed as we described elsewhere  
261<sup>47</sup>, see Methods. “Sst” was omitted from type names for brevity. **(c)** Four electrophysiological features  
262 that differed most strongly (Cohen’s  $d>1$ ) between V1 L4 and S1 L4 cells. Only cells assigned to *Sst*  
263 *Calb2 Pdlim5* and *Sst Hpse Cbln4* types are shown. Note that the values are not directly comparable to  
264 those shown in Fig. S5 because Patch-seq experiments used a different internal solution compared to  
265 regular patch-clamp experiments without RNA extraction. **(d)** Sparse reduced-rank regression analysis<sup>46</sup>:  
266 the left biplot shows two-dimensional projection in the transcriptomic space that is optimized to  
267 reconstruct the electrophysiological features. The right biplot shows the corresponding two-dimensional  
268 projection in the electrophysiological space; it should “match” to the left plot if the model is accurate. Color  
269 denotes brain area (orange for V1, red for S1), marker shape denotes transcriptomic type that each cell  
270 was assigned to (circles: *Hpse Cbln4* type; diamonds: *Calb2 Pdlim* type; open diamonds: three  
271 *Tac1/Mme* types and the neighbouring *Calb2 Necab1* type; open squares: all other types). Individual  
272 electrophysiological features and genes selected by the model are depicted with lines showing their  
273 correlations to the two components. Circles show maximal possible correlation. Cross-validated estimate  
274 of the overall R-squared was 0.16, and cross-validated estimates of the correlations between the  
275 horizontal and vertical components were 0.70 and 0.50 respectively. **(e)** Type assignments of the Patch-  
276 seq cells from L4.

277

278

279 The L5 SOM<sup>+</sup> cells that we sequenced in both areas mostly mapped to a different set of  
280 transcriptomic types than the L4 SOM<sup>+</sup> cells, but there were no apparent differences between  
281 S1 and V1 in terms of transcriptomic cell types (Fig. 4b).

282

283 **Connectivity among excitatory and SOM<sup>+</sup> neurons in L4 of V1 vs. S1**

284 So far, we have described major differences in the morphology, electrophysiology, and  
285 transcriptomic signatures of excitatory neurons and SOM<sup>+</sup> interneurons in L4 between V1 and  
286 S1. We next investigated whether there are differences in their connectivity profiles as well,  
287 using simultaneous multi-cell patch-clamp recordings. We found that certain connectivity  
288 patterns between them are very similar across both areas (Fig. 5). First, the connection  
289 probabilities among excitatory cells were low in both areas (1.0%, 7/701 in V1; 2.5%, 3/122 in  
290 S1). Second, the connection probabilities between SOM<sup>+</sup> cells were also low in both areas (0%,  
291 0/68 in V1; 3.8%, 2/52 in S1). Third, the connection probabilities from SOM<sup>+</sup> cells to excitatory  
292 cells were high in both areas (21.1%, 30/142 in V1, 26.6%, 17/64 in S1). In addition, despite  
293 their low connectivity via chemical synapses, both MCs in V1 and NMCs in S1 were similarly  
294 often interconnected by gap junctions (MCs: 23.5%, 8/34; NMCs: 30.7%, 8/26; Fig. S6).

295  
296 On the other hand, we found a striking area-specific difference in connection probabilities from  
297 excitatory to SOM<sup>+</sup> neurons. In S1, NMCs received facilitating synaptic connections from local  
298 excitatory neurons (12.5%, 8/64), in line with previous studies in young rodents<sup>14,16</sup>. In contrast,  
299 we did not find any connections (0%, 0/142) from local excitatory neurons to MCs in V1  
300 ( $p=0.0002$ , Fisher's exact test). This was also in stark contrast to MCs in L2/3 and L5 of adult  
301 mouse V1, which receive strong facilitating synaptic inputs from local PYRs in the same layers  
302<sup>28</sup> (see Discussion for further considerations).

303  
304 In addition, we tested the connectivity in V1 L4 including BCs (Fig. S10). We found that BCs  
305 followed the same connectivity rules as previously found in other layers<sup>28,48</sup>. PYRs connected to  
306 BCs with probability 12.5% (38/303), MCs inhibited BCs with probability 32.6% (15/46), and BCs  
307 inhibited each other (36.7%, 75/204), MCs (13.0%, 6/46) and PYRs (25.7%, 78/303). All of  
308 these connection patterns have also been reported in S1 L4 of young mice<sup>23</sup>. We also found  
309 that BCs were electrically coupled to each other with probability 27.5% (28/102) but were never

310 electrically coupled to MCs (0/23), in agreement with previous findings that gap junctions exist  
311 between inhibitory cells of the same type <sup>49</sup>.

312  
313 Notably, the connection probability between PYRs in V1 L4 was very low, consistent with our  
314 previous work in other layers in adult animals <sup>28</sup>, but in contrast to the findings in young and  
315 juvenile rodents <sup>50,51</sup>. To confirm that this low connectivity reflects an age effect, we measured  
316 the connectivity between PYRs in V1 L4 at different ages (P15-20 and P30-40,  $n=5$  each) using  
317 Scnn1a-Cre/Ai9 mice. We found that the connection probability monotonically decreased with  
318 age (Fig. S11): from 13.2% in P15-20 (15/114) to 5.1% in P30-40 (8/156) to 1.0% (7/701)  
319 reported above for the P55+ mice with median age P71. This is in agreement with the recent  
320 study that found 6.3% (20/315) connection probability in V1 L4 of P47±6 mice <sup>52</sup>.

321  
322 When measuring connectivity in S1 L4, no special care was taken to ensure that the tested cells  
323 were within the same barrel. At the same time, it is known that cells in S1 L4 preferentially make  
324 intra-barrel connections <sup>2,3</sup>. To address this concern, we performed a separate series of  
325 experiments using  $n=8$  Scnn1a-Cre/Ai9 mice to test intra-barrel connectivity of excitatory  
326 neurons. We used the tdTomato fluorescence signal to detect the barrels during patch clamp  
327 recordings <sup>53</sup> and performed cytochrome oxidase staining in a subset of slices to confirm that  
328 the fluorescence signal reliably corresponded to barrel boundaries <sup>3</sup> (see Methods and Fig.  
329 S12). The measured connection probability was 5.2% (5/104) which was larger than the value  
330 reported above (2.5%, 3/122) but not significantly different from it ( $p=0.48$ , Fisher's exact test).  
331 Both estimates are substantially lower than the existing estimates of intra-barrel connectivity  
332 obtained in young animals (30--35%) <sup>2,3,54</sup> which is in line with the decrease in local excitatory  
333 connectivity with age discussed above for V1 (see also Fig. S11).



334

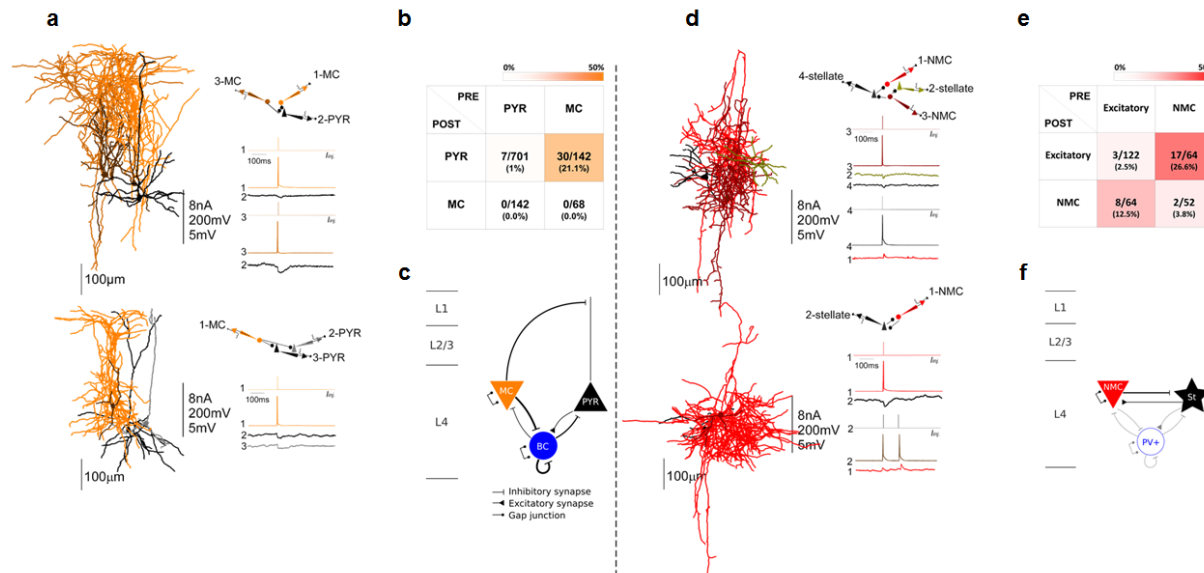

335

336 **Figure 5: Connectivity between excitatory and SOM<sup>+</sup> cells in L4 of V1 and S1. (a)** Examples of  
 337 simultaneous recordings from excitatory and SOM<sup>+</sup> neurons in V1 L4. Recorded neurons were close to  
 338 each other (generally less than 250 $\mu$ m). Vertical scale bar indicates: amplitudes of injected current in nA,  
 339 amplitude of APs in mV and amplitude of uEPSP or uIPSP in mV. **(b)** Color-coded connectivity matrix  
 340 shows the connection probability between cell types as a percentage of tested potential connections.  
 341 Average of uEPSP and uIPSP as well as PPR are reported in Fig. S7. **(c)** Schematic of the local circuitry  
 342 in L4 V1. For the connectivity involving BCs, see Fig. S8. For gap junctions, see Fig. S8. Line thickness  
 343 corresponds to connection probability. **(d-f)** The same for L4 S1. In the schematic in panel (F),  
 344 connectivity involving BCs is taken from Ma et al.<sup>23</sup> All these BCs connections are shown with the same  
 345 strength as that study used juvenile (P15) mice and so connection strengths are not directly comparable  
 346 to the values obtained in our experiments. Regarding gap junctions between FS interneurons see also  
 347 49,55.

348

349

## 350 **Discussion**

### 351 **Morphological cell types in L4: V1 vs. S1**

352 We described eight morphological cell types in L4 of primary visual cortex (V1) in adult mice as  
353 well as the connectivity patterns of three most abundant cell types. We found that nearly all  
354 excitatory neurons are pyramidal cells (as was previously described in rats <sup>26</sup>, guinea pigs <sup>56</sup>,  
355 and young mice <sup>27</sup>), in stark contrast to L4 of S1 where the majority of excitatory neurons are  
356 stellate cells <sup>5,7,57</sup>. Interestingly, L4 stellate cells in ferret V1 and mouse S1 develop postnatally  
357 from neurons that resemble pyramidal cells with an upward projecting apical dendrite <sup>7</sup>. The  
358 near absence of stellate cells in V1 L4 of adult mice (as old as 11 months in our experiments)  
359 suggests a different developmental path in this case. Excitatory neurons in V1 L4 of other  
360 species such as cats <sup>58</sup> and monkeys <sup>59</sup> are also known to be stellate. It remains an open  
361 question, why pyramidal cells in rodent V1 L4 remain pyramidal, whereas L4 excitatory cells in  
362 rodent S1 and in V1 of other non-rodent species develop into stellate cells. We suggest one  
363 hypothesis below when discussing their circuit organization.

364  
365 We found that all non-fast-spiking SOM<sup>+</sup> neurons in V1 L4 are Martinotti cells (MCs), which is  
366 also in contrast to S1 L4 where almost all SOM<sup>+</sup> neurons are non-Martinotti <sup>13,14</sup>. Using Patch-  
367 seq, we showed that SOM<sup>+</sup> MCs in V1 L4 and SOM<sup>+</sup> NMCs in S1 L4 correspond to two different  
368 transcriptomic cell types (*Sst Calb2 Pdlim* and *Sst Hpse Cbln4* respectively) previously identified  
369 in a large-scale transcriptomic cell atlas <sup>24</sup>.

370  
371 We relied on manual expert classification to isolate the morphological types. Unlike in  
372 transcriptomics, where automatic unsupervised clustering is commonplace <sup>24</sup>, morphological  
373 studies usually do not use it, because of low numbers of manually reconstructed neurons and  
374 multiple challenges to data analysis of morphological data. One recent study done in parallel to

375 our work <sup>60</sup> attempted clustering of neural morphologies from all layers of adult mouse V1.  
376 There is a broad agreement between their types from L4 and our types. There are also some  
377 differences: they split abundant types (e.g. PYRs and BPCs) into multiple narrow sub-clusters,  
378 while at the same time missing some rare types such as HECs.

379

### 380 **Transcriptomic types of SOM<sup>+</sup> interneurons in L4: V1 vs. S1**

381 Although MCs and NMCs are morphologically distinct, with no ambiguous morphological forms,  
382 they form more of a continuum in both transcriptomic and electrophysiological space. In the  
383 Tasic et al. reference dataset <sup>24</sup>, the MC and the NMC clusters (*Sst Calb2 Pdlim* and *Sst Hpse*  
384 *Cbln4* respectively), although distinct, were close and partially overlapping in the t-SNE  
385 visualisation (Fig. 4b). Consistent with this, Tasic et al. <sup>24</sup> also found intermediate cells between  
386 the “core” members of these two clusters. We showed that, electrophysiologically, MCs and  
387 NMCs also form a continuum (Fig. 4d, Fig. S6) with all electrophysiological features having  
388 unimodal distributions (Fig. 4c). This is in agreement with the findings of Naka et al. <sup>45</sup> who  
389 demonstrated an electrophysiological continuum between NMCs in S1 L4 and MCs in S1 L5.  
390 How these cells develop sharply distinct morphologies given overlapping transcriptomic and  
391 electrophysiological profiles, is an interesting open question.

392

393 Even though we did not identify any NMCs in V1, the transcriptomic reference dataset <sup>24</sup>  
394 contained many V1 cells from the *Sst Hpse Cbln4* type, and we found that around a third of  
395 MCs from V1 had transcriptomic profile mapping to this type. These cells show an  
396 electrophysiological profile intermediate between MCs and NMCs, but morphologically  
397 correspond to MCs based on our data. We hypothesize that these cells may be “latent NMCs”,  
398 present in V1, but failing to develop a NMC morphology due to the nearly complete absence of  
399 stellate cells in V1. Tasic et al. <sup>24</sup> showed that the majority of transcriptomic inhibitory types are

400 shared between two very different cortical areas (V1 and ALM). Our findings demonstrate that  
401 this does not necessarily imply that morphological types are also all shared.

402

403 Using Patch-seq, we also performed single-cell RNA-sequencing of a small number of L5 SOM<sup>+</sup>  
404 cells in both S1 and V1. Morphologically, almost all SOM<sup>+</sup> cells in V1 L5 (except some fast-  
405 spiking cells)<sup>28,45</sup> and the majority of SOM<sup>+</sup> cells in S1 L5<sup>21,28,45,61</sup> are known to be MCs. We  
406 found that L5 SOM<sup>+</sup> cells had electrophysiological features similar to L4 MCs (Fig. 4d), but  
407 mostly mapped to a different set of transcriptomic clusters than the L4 SOM<sup>+</sup> cells (Fig. 4b).  
408 These results identify five transcriptomic clusters from Tasic et al.<sup>24</sup> as L5 MCs, but the  
409 differences between these clusters remain unclear.

410

#### 411 **Towards multimodal cell type definition**

412 In this work we have focused on morphologically defined cell types. At the same time, there is a  
413 growing understanding that cell type definitions should take into account multimodal information,  
414 such as morphology, electrophysiology, and transcriptomics, as opposed to being based on a  
415 single modality<sup>62</sup>. In our V1 L4 data set, we identified seven morphological types of  
416 interneurons but only four electrophysiological types (Fig. 2): four PV<sup>+</sup> could not be  
417 distinguished on the basis of their firing as they were all fast-spiking. This is in a qualitative  
418 agreement with the findings of Gowens et al.<sup>60</sup> who identified twice as many morphological  
419 types (m-types) as electrophysiological ones (e-types). We only obtained the transcriptomic  
420 information for SOM<sup>+</sup> neurons, but found out that MCs in V1 L4 could belong to two different  
421 transcriptomics types (t-types), one of which corresponded to NMCs in S1; inside V1, the cells  
422 from these two t-types had slightly different electrophysiology (Fig. 4). An integrative definition of  
423 cell type in V1 should take this into account.

424

425 Importantly, the SOM-Cre line does not label neurons in exact correspondence with  
426 transcriptomic classes. We found that ~8% of V1 L4 neurons labeled in the SOM-Cre line were  
427 fast-spiking cells with the morphology of basket cells (Fig. 3), in agreement with previous reports  
428 <sup>28,41,42</sup>. In our patch-seq experiments we found three sequenced SOM-Cre<sup>+</sup> neurons that were  
429 fast-spiking and mapped to *Pvalb* transcriptomic types. We did not detect SOM (zero read  
430 count) in either of these three cells, suggesting that they likely had transiently expressed it  
431 during development, as hypothesized by Hu et al. <sup>41</sup> Interestingly, all three cells mapped to the  
432 same *Pvalb* type: *Pvalb Reln Itm2a*.

433

#### 434 **Circuit organization in L4: V1 vs. S1**

435 In terms of connectivity, both MCs in V1 and NMCs in S1 avoid connecting to each other (apart  
436 from forming gap junctions; Fig. S8), and project to excitatory population in L4. Moreover, the  
437 axonal morphologies of these two cell types seemed to match the respective dendritic  
438 morphologies of their excitatory neuronal targets. In V1, axons of L4 MCs primarily projected to  
439 L1 where they are potentially able to synapse onto the tuft of L4 PYRs, similar to the pattern  
440 described in other cortical layers <sup>63,64</sup>. In S1, by contrast, axons of L4 NMCs were more  
441 localized, matching the more compact dendritic structure of stellate cells. This observation is in  
442 line with previous findings that the excitatory identity controls the survival and wiring of local  
443 interneurons <sup>65,66</sup>. We suggest that the difference in the morphology of SOM<sup>+</sup> neurons between  
444 these two cortical areas might be a result of the difference in dendritic organization of the  
445 targeted excitatory neurons. Consistent with this, in S1 L5 where the principal excitatory cells  
446 are pyramidal, their inhibitory input comes from L5 MCs <sup>45</sup>. We hypothesize that the reshaping  
447 of excitatory neurons' apical dendrites in S1 L4 during development, which depends on the  
448 sensory input <sup>7</sup>, could be followed by the corresponding reshaping of SOM<sup>+</sup> neurons. It will be  
449 interesting to test whether this MC/pyramidal and NMC/stellate pairing exists in other cortical  
450 areas and other species.

451  
452 On the other hand, while we found that SOM<sup>+</sup> cells receive inputs from local excitatory neurons  
453 in S1 L4, in agreement with previous studies<sup>14,23</sup>, we did not detect connections from L4 PYRs  
454 to L4 MCs in V1. SOM<sup>+</sup> MCs in other layers are known to receive facilitating excitatory inputs  
455 from local principal neurons in both S1<sup>67,68</sup> and V1<sup>28,69</sup>. However, our results suggest that L4  
456 MCs in V1 behave differently. Interestingly, previous studies have also shown that in V1, L4  
457 MCs also receive weak inputs from LGN compared to other interneuron types<sup>20,21</sup>. Within S1,  
458 Naka et al.<sup>45</sup> showed that L4 excitatory neurons connect to NMCs in L5 but not to MCs in L5,  
459 which together with our findings, suggests that even across layers, stellate cells do not target  
460 MCs but only NMCs. Further investigations are needed to test whether L4 MCs in V1 are driven  
461 by PYRs in other layers or by long-range inputs from other areas.

462  
463 In addition to examining the connectivity among PYRs and MCs in V1 L4, we tested the  
464 connectivity of BCs, another major cell type in L4 (Fig. S10). We found that BCs in L4 followed  
465 the same connectivity rules as described for basket cells in other layers<sup>28</sup> and in younger  
466 animals<sup>48</sup>: BCs inhibit other BCs, MCs, and pyramidal cells, and are inhibited by MCs and  
467 excited by PYRs. All of these connection patterns have also been reported in S1 L4 in young  
468 mice<sup>23</sup>, suggesting that the circuitry wiring involving PV<sup>+</sup> cells is roughly conserved between  
469 these two areas and across age.

470  
471 Finally, we found very low connection probability between PYRs in V1 L4, which was consistent  
472 with the findings in V1 L2/3 and V1 L5 of adult mice<sup>28</sup>, but much lower than what was reported  
473 in young animals<sup>70,71</sup>. We directly showed that this difference in connection probability among  
474 excitatory neurons is due to the age of the animal (Fig. S11).

475

476 **Summary**

477 In conclusion, we confirmed the difference in morphology of L4 principal cells and revealed a  
478 difference in morphology of L4 SOM<sup>+</sup> interneurons in V1 and S1 of adult mice. In each area, the  
479 morphology of SOM<sup>+</sup> interneurons matched that of the excitatory neurons, suggesting that one  
480 of them might adapt to another. Furthermore, we found differences in the connections from  
481 excitatory neurons to SOM<sup>+</sup> interneurons, suggesting a different functional role of SOM<sup>+</sup>  
482 interneurons in different cortical areas. In addition, we found that there is no one-to-one match  
483 between the morphological and the transcriptomic types of SOM<sup>+</sup> interneurons, highlighting the  
484 need of multi-modal profiling of cell types in the neocortex. Our results support the view that  
485 cell-type-specific circuit motifs, such as the Martinotti/pyramidal and non-Martinotti/stellate pairs,  
486 are used as building blocks to assemble the neocortex.

## 487 **Methods**

### 488 **Data and code availability**

489 Patch-seq data will be made available at <https://www.ncbi.nlm.nih.gov/geo/>. Apart from the raw  
490 reads, it will include a table of read counts, a table of RPKM values, and a table of the extracted  
491 electrophysiological features. Morphological reconstructions will be made available at  
492 <http://neromorpho.org>. Raw electrophysiological recordings will be made available at  
493 <http://zenodo.org>.

494  
495 The analysis code in Python will be made available at <http://github.com/berenslab/layer4>. This  
496 includes data analysis of electrophysiological recordings, data analysis of the morphological  
497 reconstructions, and data analysis of the transcriptomic data. This repository also includes a  
498 table of the extracted electrophysiological features for the morphological data set.

499

### 500 **Animals**

501 Experiments on adult male and female mice (median age 72, interquartile range 63--88, full  
502 range 50--330 days, Fig. S1) were performed using wild-type ( $n=24$ ), *Viaat-Cre/Ai9* ( $n=47$ ),  
503 *Scnna1-Cre/Ai9* ( $n=5$  for V1 and  $n=5$  for S1), *SOM-Cre/Ai9* ( $n=14$  for V1 and  $n=19$  for S1), *VIP-*  
504 *Cre/Ai9* ( $n=8$ ), and *PV-Cre/Ai9* mice ( $n=31$ ). Crossing *Viaat-Cre* mice (*Viaat* encodes a  
505 transporter required for loading GABA and glycine) with *Ai9* reporter mice globally labels  
506 GABAergic interneurons with the fluorescence marker *tdTomato*<sup>37</sup>. *SOM-Cre/Ai9* mice, *VIP-*  
507 *Cre/Ai9* mice, and *PV-Cre/Ai9* mice have *SOM*<sup>+</sup> interneurons, *PV*<sup>+</sup> interneurons and *VIP*<sup>+</sup>  
508 interneurons labeled with the fluorescent marker *tdTomato* respectively. *Scnn1a-Cre/Ai9* mice  
509 have excitatory neurons in L4 selectively labeled with *tdTomato*. Additional younger *Scnn1a-*  
510 *Cre/Ai9* mice (P15-20,  $n=5$ ; P30-40,  $n=5$ ) were used to study connectivity between excitatory  
511 neurons at the different ages. Additional *Scnn1a-Cre/Ai9* mice ( $n=8$ ) were used for measuring



512 within-barrel connectivity between excitatory neurons in S1. Additional SOM-Cre/Ai9 mice ( $n=6$ )  
513 were used for patch-seq experiments. Animal preparation procedures for animals maintenance  
514 and surgeries were performed according to protocols approved by the Institutional Animal Care  
515 and Use Committee (IACUC) of Baylor College of Medicine.

516  
517 Viatt-Cre line was generously provided by the Dr. Huda Zoghbi's laboratory. The other Cre lines  
518 were purchased from Jackson Laboratory:

- 519 • SOM-Cre: <http://jaxmice.jax.org/strain/013044.html>;
- 520 • VIP-Cre: <http://jaxmice.jax.org/strain/010908.html>;
- 521 • PV-Cre: <http://jaxmice.jax.org/strain/008069.html>;
- 522 • Scnn1a-Cre: <https://www.jax.org/strain/013044>;
- 523 • Ai9 reporter: <http://jaxmice.jax.org/strain/007909.html>.

524

## 525 **Slice preparation**

526 Slice preparation followed methods previously described in Jiang et al. (2015). Briefly, animals  
527 were deeply anesthetized using 3% isoflurane. After decapitation, the brain was removed and  
528 placed into cold (0–4 °C) oxygenated NMDG solution containing 93 mM NMDG, 93 mM HCl, 2.5  
529 mM KCl, 1.2 mM NaH<sub>2</sub>PO<sub>4</sub>, 30 mM NaHCO<sub>3</sub>, 20 mM HEPES, 25 mM glucose, 5 mM sodium  
530 ascorbate, 2 mM Thiourea, 3 mM sodium pyruvate, 10mM MgSO<sub>4</sub> and 0.5 mM CaCl<sub>2</sub>, pH 7.35  
531 (all from SIGMA-ALDRICH). 300 μm thick parasagittal slices were cut and special care was  
532 taken to select only slices that had a cutting plane parallel to the apical dendrites to ensure  
533 preservation of both axonal and dendritic arborization structures. The slices were incubated at  
534 37.0±0.5 °C in oxygenated NMDG solution for 10-15 minutes before being transferred to the  
535 artificial cerebrospinal fluid solution (ACSF) containing: 125 mM NaCl, 2.5 mM KCl, 1.25 mM  
536 NaH<sub>2</sub>PO<sub>4</sub>, 25 mM NaHCO<sub>3</sub>, 1 mM MgCl<sub>2</sub>, 25 mM glucose and 2 mM CaCl<sub>2</sub>, pH 7.4 (all from

537 SIGMA-ALDRICH) for about 1 h. During recordings, slices were continuously perfused with  
538 oxygenated physiological solution throughout the recording session.

539

#### 540 **Electrophysiological recordings**

541 Recordings were performed using patch recording pipettes (5–8 M $\Omega$ ) filled with intracellular  
542 solution containing 120 mM potassium gluconate, 10 mM HEPES, 4 mM KCl, 4 mM MgATP, 0.3  
543 mM Na3GTP, 10 mM sodium phosphocreatine and 0.5% biocytin, pH 7.25 (all from SIGMA-  
544 ALDRICH). We used two Quadro EPC 10 amplifiers that allowed us to perform simultaneous  
545 recordings up to 8 cells. The PatchMaster software and custom-written Matlab-based programs  
546 were used to operate the Quadro EPC 10 amplifiers and perform online and offline analysis of  
547 the data. In order to extract information about passive membrane properties and firing patterns,  
548 neurons' responses were recorded upon 600 ms long current pulse injections starting from -100  
549 / -200 pA with 20 pA step.

550

551 To identify synaptic connections, current pulses were injected into the presynaptic neurons (2  
552 nA for 2 ms at 0.01–0.1 Hz) to evoke AP while post-synaptic membrane potential of other  
553 simultaneously recorded neurons were monitored to detect unitary inhibitory or excitatory  
554 postsynaptic potentials (ul(E)PSPs). The ulPSPs were measured while the membrane  
555 potentials of the putative postsynaptic cells were held at  $-60\pm 3$  mV, whereas uEPSPs were  
556 measured while membrane potentials of the putative postsynaptic cells were held at  $-70\pm 3$  mV.  
557 Paired-pulse ratio (PPR) was calculated as the ratio between the mean amplitude of the second  
558 and the first uEPSC obtained by injecting the presynaptic neuron with two consecutive stimuli  
559 of 2nA with 100ms interval. We recorded 10-30 individual traces, average of which was used to  
560 calculate ul(E)PSPs amplitude.

561

562 Neurons were assigned to L4 based on the neocortical layer boundaries and the small neuronal  
563 somata that characterize this layer, which were clearly visible in the micrograph under the  
564 bright-field microscope. The layer identity of each neuron was also confirmed *post-hoc* by the  
565 visualization of their position after the staining.

566

567 Because the synaptic connectivity strongly depends on the inter-soma distance<sup>28</sup>, we took  
568 special care to record from groups of neurons with inter-soma distances less than 250  $\mu\text{m}$ . To  
569 make sure that the identified connections were monosynaptic, we morphologically confirmed  
570 *post-hoc* the presynaptic neurons for all connections and made sure that the morphology and  
571 electrophysiology of the presynaptic neuron for each connection (i.e. pyramidal neurons vs.  
572 interneurons) matched the nature of connections (i.e. EPSP vs. IPSP). Indeed, the recovered  
573 morphology (i.e. pyramidal neurons vs. interneurons) and EPSP vs. IPSP always matched.  
574 Typical recording depth was 15--60  $\mu\text{m}$ , similar to previous studies<sup>28,70,72</sup>.

575

576 Importantly, neuronal structures can be severed (a limitation of all slice electrophysiology  
577 experiments) due to the slicing procedure, introducing a potential underestimation of the  
578 neuronal morphology and connectivity. However, this did not seem to strongly influence the  
579 study of local circuits in the past<sup>28,73</sup>.

580

### 581 **Staining and morphology recovery**

582 After the end of the patch-clamp recording, the slices were fixed by immersion in freshly-  
583 prepared 2.5% glutaraldehyde (from Electron Microscopy Science Cat.no. 16220), 4%  
584 paraformaldehyde (from SIGMA-ALDRICH Cat.no. P6148) in 0.1 M phosphate-buffered saline  
585 at 4°C for at least 72h. The slices were subsequently processed with the avidin-biotin-  
586 peroxidase method in order to reveal the morphology of the neurons. To increase the success  
587 rate in recovering the morphology of GABAergic interneurons, especially detail of their fine

588 axonal arbors, we made additional modifications described as previously<sup>28,29</sup>. The  
589 morphologically recovered cells were examined and reconstructed using a 100X oil-immersion  
590 objective lens and a camera lucida system. Tissue shrinkage due to the fixation procedure was  
591 not compensated for. The shrinkage of the tissue surrounding the biocytin-stained cells was  
592 about 10--20%, consistent with previous studies<sup>28,50</sup>.

593

594 For barrel identification and comparison with tdTomato signal in Scnn1a-Cre mice, we  
595 performed cytochrome C staining following protocols described in the literature<sup>3,74</sup>. To find the  
596 barrel locations in images with cytochrome C and tdTomato (Fig. S10A), we averaged the pixel  
597 intensities as a function of horizontal position within the L4. The resulting intensity trace was  
598 normalized to lie between 0 and 1 and high-pass filtered to compensate for the uneven  
599 brightness of the images. To do the high-pass filter, we used a Fourier function of the form:

600 
$$y = a_0 + \sum_{i=1}^2 a_i \cos(iwx) + b_i \sin(iwx)$$

601 that was fitted to each trace ( $w$  was fitted along the  $a_i$  and  $b_i$  coefficients) and then subtracted  
602 from it. The signal from the cytochrome C was inverted to match the directionality of the  
603 tdTomato signal. Barrel center locations were estimated as the positions of the peaks after  
604 smoothing with a  $\sigma=250 \mu\text{m}$  Gaussian filter.

605

### 606 **Patch-seq procedure and sequencing**

607 To obtain electrophysiology and transcriptome data from single neurons, we used our recently  
608 described Patch-seq protocol<sup>29</sup> with the following additional modifications. Recording pipettes of  
609 5 M $\Omega$  resistance were filled with RNase-free intracellular solution containing: 101 mM potassium  
610 gluconate, 4 mM KCl, 10 mM HEPES, 0.2 mM EGTA, 4 mM MgATP, 0.3 mM Na<sub>3</sub>GTP, 5 mM  
611 sodium phosphocreatine (all from SIGMA-ALDRICH), and 1 U/ $\mu\text{l}$  recombinant RNase inhibitor  
612 (Takara Cat.no. 2313A), pH ~7.25. The cDNA was amplified using 18 amplification cycles and

613 the size distribution and concentration of the libraries were analyzed with an Agilent Bioanalyzer  
614 2100. cDNA samples containing less than 1.5 ng total cDNA, or with an average size less than  
615 1,500 bp were not sequenced.

616

617 To construct the final sequencing libraries, 0.2 ng of purified cDNA from each sample was  
618 tagged using the Illumina Nextera XT Library Preparation using  $\frac{1}{5}$  of the volumes stated in  
619 the manufacturer's recommendation. The DNA was sequenced from single end (75 bp) with  
620 standard Illumina Nextera i5 and i7 index primers (8 bp each) using an Illumina NextSeq500  
621 instrument. Investigators were blinded to cell type during library construction and sequencing.

622

623 Reads were aligned to the mouse genome (*mm10* assembly) using STAR (v2.4.2a) with default  
624 settings. We only used read counts (and not RPKM values, number of reads per kilobase of  
625 transcript per million total reads) for all data analysis presented here, but for completeness we  
626 mention that RPKM values were computed using *rpkmforgenes*<sup>75</sup> and NCBI RefSeq gene  
627 and transcript models (downloaded on the 24th of June 2014).

628

### 629 **Data analysis of the morphological reconstructions**

630 Reconstructed morphologies of  $n=92$  cells were converted into SWC format and further  
631 analyzed using custom Python code (see the github repository linked above). Each cell was  
632 soma-centered and rotated such that the z coordinate (height) was oriented along the cortical  
633 depth and the x coordinate (width) was oriented along the first principal component of the xy  
634 point cloud, i.e. roughly corresponded to the cell's largest extent in the plane orthogonal to the  
635 cortical depth. For further analysis we computed and combined two different feature  
636 representations of each cell: the XZ density map and a set of morphometric statistics.

637

638 XZ density map

639 We sampled equidistant points with 100 nm spacing along each neurite and normalized the  
640 resulting point cloud such that the smallest coordinate across all points of all cells was 0 and the  
641 largest was 1<sup>76</sup>. The normalized point cloud was projected onto the *xz*-plane and binned into  
642 100×100 bins spanning [-0.1, 1.1]. We smoothed the resulting density map by convolving it with  
643 a 11×11 bin Gaussian kernel with standard deviation  $\sigma=2$ . For the purposes of downstream  
644 analysis, we treated this as set of 10,000 features.

645

#### 646 Morphometric statistics

647 For each cell we computed a set of 16 summary statistics: number of branch points, cell width,  
648 cell depth, cell height, number of tips, number of stems, total neurite length, maximal neurite  
649 length, maximum branch order, maximal segment length, average tortuosity, maximal tortuosity,  
650 average branch angle, maximal branch angle, average path angle, and maximal path angle.

651

#### 652 Pairwise classification

653 We followed the pipeline that we recently benchmarked in Laturus et al.<sup>43</sup>. As predictors for  
654 pairwise classification we used morphometric statistics and density maps. Due to the very high  
655 dimensionality of the density maps, we reduced them to 10 principal components (for cross-  
656 validation, PCA was computed on each outer-loop training set separately, and the same  
657 transformation was applied to the corresponding outer-loop test set). This makes the final  
658 feature dimensionality equal to 36.

659

660 For classification, we used logistic regression regularized with elastic net. Regularization  
661 parameter alpha was fixed to 0.5, which is giving equal weights to the lasso and ridge penalties.  
662 We used nested cross-validation to choose the optimal value of the regularization parameter  
663 lambda and to obtain an unbiased estimate of the performance. The inner loop was performed  
664 using the `civisanalytics` Python wrapper around the `glmnet` library<sup>77</sup> that does K-fold

665 cross-validation internally. We used 5 folds for the inner loop. We kept the default setting which  
666 uses the maximal value of lambda with cross-validated loss within one standard error of the  
667 lowest loss (`lambda_best`) to make the test-set predictions:

```
668     LogitNet(alpha=0.5, n_splits=5, random_state=42)
```

669 Note that the default behavior of `glmnet` is to standardize all predictors. The outer loop was 10  
670 times repeated stratified 5-fold cross-validation, as implemented in `scikit-learn` by

```
671     RepeatedStratifiedKFold(n_splits=5, n_repeats=10, random_state=43)
```

672 Outer-loop performance was assessed via test-set accuracy.

673

#### 674 t-SNE

675 For the t-SNE visualization, we reduced density maps and morphometric statistics of the  $n=92$   
676 cells to 10 principal components each. We scaled each set of 10 PCs by the standard deviation  
677 of the respective PC1, to make three sets be roughly on the same scale. Then we stacked them  
678 together to obtain a 20-dimensional representation of each cell. Exact (non-approximate) t-SNE  
679 was run with perplexity 15, random initialisation with seed 42, and early exaggeration 4, using  
680 `scikit-learn` implementation:

```
681     TSNE(perplexity=15, method='exact',  
682         random_state=42, early_exaggeration=4)
```

683

#### 684 **Automatic extraction of electrophysiological features**

685 Thirteen electrophysiological features were automatically extracted using Python scripts from  
686 the Allen Software Development Kit (<https://github.com/AllenInstitute/AllenSDK>) with additional  
687 modifications to account for our experimental paradigms (see the github repository linked  
688 above). An illustration of the feature extraction procedure for one exemplary neuron is shown in  
689 Fig. S1. Here we briefly specify how each feature was extracted.

690

691 The resting membrane potential and the input resistance were computed differently for the  
692 standard patch-clamp/morphology recordings and for the Patch-seq recordings, because of the  
693 differences in the stimulation protocol between these two sets of experiments. In the Patch-seq  
694 experiments, the current clamp value before each current stimulation was fixed at 0 pA for all  
695 cells. Consequently, we computed the resting membrane potential as the median membrane  
696 voltage before stimulation onset. Input resistance for each hyperpolarizing stimulation was  
697 calculated as the ratio of the maximum voltage deflection to the corresponding current value.  
698 We took the median of all hyperpolarizing currents as the final input resistance value. In  
699 contrast, in the standard patch-clamp experiments, the current clamp before current stimulation  
700 was not always fixed at 0 pA. For that reason we used linear regression (for robustness, random  
701 sample consensus regression, as implemented in `scikit-learn`) of the steady state  
702 membrane voltage onto the current stimulation value to compute the input resistance  
703 (regression slope) and the resting membrane potential (regression intercept) (Fig. S1D). For this  
704 we used five highest hyperpolarizing currents (if there were fewer than five, we used those  
705 available).

706  
707 To estimate the rheobase (minimum current needed to elicit any spikes), we used robust  
708 regression of the spiking frequency onto the stimulation current using the five lowest  
709 depolarizing stimulation currents with non-zero spike count (if there fewer than five, we used  
710 those available) (Fig. S1D). The point where the regression line crosses the  $x$ -axis gives the  
711 rheobase estimate. We restricted the rheobase estimate to be between the highest current  
712 clamp value eliciting no spikes and the lowest current clamp value eliciting at least one spike. In  
713 the rare cases when the regression line crossed the  $x$ -axis outside of this interval, the nearest  
714 edge of the interval was taken instead as the rheobase estimate.

715



716 The action potential (AP) threshold, AP amplitude, AP width, afterhyperpolarization (AHP),  
717 afterdepolarization (ADP), and the first spike latency were computed as illustrated in Fig. S1C,  
718 using the very first spike fired by the neuron. AP width was computed at the half AP height.

719  
720 The adaptation index (AI) is defined as the ratio of the second interspike interval to the first one  
721 (Fig. S1B). We took the median over the five lowest depolarizing current stimulation that elicited  
722 at least three spikes (if fewer than five were available, we used all of them).

723  
724 The maximum number of spikes simply refers to the maximum number of spikes emitted in the  
725 600 ms stimulation window over all stimulation currents (Fig. S1A). The membrane time  
726 constant ( $\tau$ ) was computed as the time constant of the exponential fit to the first phase of  
727 hyperpolarization (median over all hyperpolarizing traces). Finally, the sag ratio is defined as the  
728 ratio of the maximum membrane voltage deflection to the steady state membrane voltage during  
729 the first (the lowest) hyperpolarizing current clamp stimulation.

730

### 731 **Data analysis of the electrophysiological features**

732 For the t-SNE visualization (Fig. 2B), we log-transformed the AI values because this feature had  
733 a strongly right-skewed distribution (Fig. S1). We also excluded ADP and latency; ADP  
734 because it was equal to zero for most neurons and rare cells with non-zero values appeared as  
735 isolated subpopulations in the t-SNE representation, and latency because it had high outliers  
736 among the FS types, also yielding isolated subpopulations. The remaining 11 features were z-  
737 scored and exact (non-approximate) t-SNE was run with perplexity 15 and random initialisation  
738 with seed 42 using `scikit-learn` implementation:

```
739     TSNE(perplexity=15, method='exact', random_state=42)
```

740

741 For pairwise classification, we used exactly the same procedure as described above for  
742 pairwise classification using the reconstructed morphologies (nested cross-validation with  
743 logistic regression regularized with elastic net). All 13 features were used, with log-transformed  
744 AI and log-transformed latency (as shown in Fig. S1).

745

## 746 **Data analysis of the RNA-seq data**

### 747 Quality control

748 The total number of sequenced cells was  $n=118$ . Four cells were excluded because the sum of  
749 counts across all genes (library size) was below 1500 (Fig. S3a). The remaining  $n=114$  cells  
750 were mapped to the full set of 133 transcriptomic clusters identified in Tasic et al. <sup>24</sup>; see below  
751 for the details. One cell was excluded because it mapped to one of the excitatory types, and  
752 three cells were excluded because they mapped to *Pvalb Reln Itm2a* type (and were fast-  
753 spiking). All the remaining  $n=110$  cells mapped to the *Sst* clusters. Among those, eight cells did  
754 not have good electrophysiological recordings (the recordings were either lost or were of bad  
755 quality) and were excluded from all downstream analyses that required electrophysiological data  
756 (leaving  $n=102$  cells).

757

### 758 Mapping to the reference clusters

759 Using the count matrix of Tasic et al. ( $n=23,822$ ,  $d=45,768$ ), we selected 3000 “most variable”  
760 genes (see below). We then log-transformed all counts with  $\log_2(x+1)$  transformation and  
761 averaged the log-transformed counts across all cells in each of the 133 clusters, to obtain  
762 reference transcriptomic profiles of each cluster (133×3000 matrix). Out of these 3000 genes,  
763 2686 were present in the *mm10* reference genome that we used to align reads in our data (see  
764 above). We applied the same  $\log_2(x+1)$  transformation to the read counts of our cells, and for  
765 each cell computed Pearson correlation across the 2686 genes with all 133 Tasic et al. clusters.  
766 Each cell was assigned to the cluster to which it had the highest correlation.

767

## 768 Gene selection

769 To select “most variable” genes, we found genes that had, at the same time, high non-zero  
770 expression and high probability of near-zero expression<sup>78</sup>. Our procedure is described in more  
771 detail elsewhere<sup>47</sup>. Specifically, we excluded all genes that had counts of at least 32 in fewer  
772 than 10 cells. For each remaining gene we computed the mean  $\log_2$  count across all counts that  
773 were larger than 32 (non-zero expression,  $\mu$ ) and the fraction of counts that were smaller than  
774 32 (probability of near-zero expression,  $\tau$ ). Across genes, there was a clear inverse relationship  
775 between  $\mu$  and  $\tau$ , that roughly follows exponential law  $\tau \approx \exp(-1.5\cdot\mu+a)$  for some horizontal  
776 offset  $a$ . Using a binary search, we found a value  $b$  of this offset that yielded 3000 genes with  $\tau$   
777  $> \exp(-1.5\cdot\mu+b) + 0.02$ . These 3000 genes were selected.

778

## 779 t-SNE

780 The t-SNE visualization of the whole Tasic et al.<sup>24</sup> dataset shown in Fig. S3C was taken from  
781 our previous work<sup>47</sup>. It was computed there using scaled PCA initialization and perplexity  
782 combination of 30 and 238 (1% of the sample size), following preprocessing steps of library size  
783 normalization (by converting counts to counts per million), feature selection (3000 most variable  
784 genes),  $\log_2(x+1)$  transformation, and reducing the dimensionality to 50 using PCA.

785

786 To make t-SNE visualization of the somatostatin part of the Tasic et al. dataset (Fig. 4b), we  
787 selected all cells from all *Sst* clusters apart from the very distinct *Sst Chodl* (20 clusters, 2701  
788 cells). Using these cells, we selected 500 most variable genes using the same procedure as  
789 described above. We used the same preprocessing steps as above, perplexity 50, and scaled  
790 PCA initialisation<sup>47</sup>.

791

792 Mapping to t-SNE

793 For each of the  $n=110$  Patch-seq cells, we computed its Pearson correlation with each of the  
794 2701 reference cells across the 500 genes, most variable in the somatostatin part of the Tasic  
795 et al. data set (only 472 genes present in our data were used). Then we found 10 reference  
796 cells with the highest correlations (10 “nearest neighbours” of the Patch-seq cell) and positioned  
797 our cell at the coordinate-wise median t-SNE location of those 10 reference cells <sup>47</sup>.

798

799 Mapping to somatostatin clusters

800 The mapping of the  $n=110$  Patch-seq cells to the 20 somatostatin clusters (Fig. 4C, S3) was  
801 done exactly as the mapping to the full set of 133 clusters described above, but this time only  
802 using 500 genes, most variable in the somatostatin part of the Tasic et al. <sup>24</sup> data set (only 472  
803 genes present in our data were used).

804

805 Sparse reduced-rank regression

806 We used our implementation of sparse reduced-rank regression (RRR) described in detail  
807 elsewhere <sup>46</sup>. For the analysis shown in Fig. 4e, we selected 1000 most variable genes as  
808 described above, using  $n=102$  Patch-seq cells with high-quality electrophysiological recordings.  
809 The gene counts were converted to counts per million and  $\log_2(x+1)$ -transformed. The columns  
810 of the resulting  $102 \times 1000$  expression matrix were standardized. All electrophysiological features  
811 were standardized as well. The rank of RRR was fixed at 2. We used 10-fold cross-validation to  
812 select the values of alpha and lambda regularization parameters that would maximize the  
813 predicted R-squared. This yielded  $\alpha=0.5$  and  $\lambda=1$  (with “relaxed elastic net” <sup>46</sup>). Fig.  
814 4E shows scatter plots of the two standardized RRR components in the transcriptomic and in  
815 the electrophysiological spaces. Features and genes are depicted as lines showing correlations  
816 of a feature/gene with each of the two components. In the electrophysiological space, all  
817 features are shown. In the transcriptomic space, only genes selected by the model are shown.

818 The values of R-squared and correlations between the components from electrophysiological  
819 and transcriptomic spaces reported in the caption of Fig. 4e are cross-validation estimates.

## 820 **Supplementary text and figures**

821

### 822 **Detailed description of interneuron cell types**

823

824 BCs were the most abundant interneuron type (37.6%, 88/234). Somata of these neurons were  
825 usually larger than those of other L4 neurons. Their dendrites projected vertically in a bi-tufted  
826 manner, without a complex horizontal structure. The most salient morphological feature of BCs  
827 was a thick axon originating from the apical side of the soma. It typically projected towards L2/3  
828 before forming a series of major branches that extensively spread above the apical region of the  
829 soma with few branches projecting horizontally and vertically downward to L5. All BCs exhibited  
830 a fast-spiking (FS) firing pattern with narrow AP width and high maximal firing rate (Fig. 1b).

831

832 MCs (20.1%, 47/234) were similar to those previously described both in developing cortex and  
833 in mature cortex in other layers<sup>28,79–81</sup>. They had bi-tufted dendrites with vertically or obliquely  
834 oriented branches. All of them had an ascending axon that projected to L2/3 and L1, where it  
835 ramified horizontally and formed a dense axonal cluster of variable extension. A small subset of  
836 MCs (8.9%, 11 out of all 124 recovered MCs) showed a secondary axonal cluster within L4 (e.g.  
837 the last two MCs in Fig. 1a). Firing pattern and electrophysiological properties showed a strong  
838 correspondence to L2/3 and L5 MCs described in both adult<sup>28</sup> and developing cortex<sup>81</sup>. In  
839 particular, these neurons were distinguished from other interneurons by their large membrane  
840 time constant (Fig. 1b).

841

842 BPCs (12.4%, 29/234) had a small soma and bipolar dendrites projecting to L1 and L5. The  
843 ascending dendrites formed a tuft in L1, similar to the structure of apical dendrites of PYRs.  
844 However, their dendrites lacked dendritic spines. The axon emerged from one of the

845 descending dendrites and projected predominantly to L5. All BPCs showed an irregular-firing  
846 pattern associated with a high input resistance and large AP amplitude (Fig. 1b).

847  
848 NGCs (11.5%, 27/234) were characterized by a very thin axon that highly ramified and formed a  
849 dense arborization around cell bodies. These neurons fired late-spiking action potentials with  
850 large AP width and high AP threshold (Fig. 1b).

851  
852 SCs (9.4%, 22/234) were similar to shrub cells that have been previously described in L5 of  
853 adult mouse<sup>28</sup> and small BCs in L2/3 and L4 of young rats<sup>28,82</sup>. These neurons had non-  
854 polarized dendritic branches mostly residing in L4 and a thick axon often emerging from the  
855 apical region of the cell bodies and branching locally around their soma. All SCs exhibited an FS  
856 firing pattern (Fig. 1b).

857  
858 DBCs (5.6%, 13/234) had large cell bodies and vertically-oriented bi-tufted dendrites, similar to  
859 BCs. However, unlike BCs, the thick axon emerged often from the bottom of the soma,  
860 projecting shortly towards L5 and forming several branches that projected upwards to L2/3 and  
861 downwards to L5 with variable distances. Notably, the axons of these cells extended also  
862 horizontally into L2/3 and L5, differing slightly from DBCs previously described in L2/3<sup>28</sup>. All  
863 DBCs exhibited an FS firing pattern (Fig. 1b).

864  
865 HECs (3.4%, 8/234), with their horizontally extended axonal branches, were similar to the HECs  
866 previously reported in L5<sup>28,83</sup>. In particular, the axon had a thick primary structure that often  
867 emerged from the apical side of the soma and bifurcated into secondary structures that spread  
868 horizontally mostly within L4. All HECs exhibited an FS firing pattern (Fig. 1b).

869  
870

871 **Supplementary Figures**

872

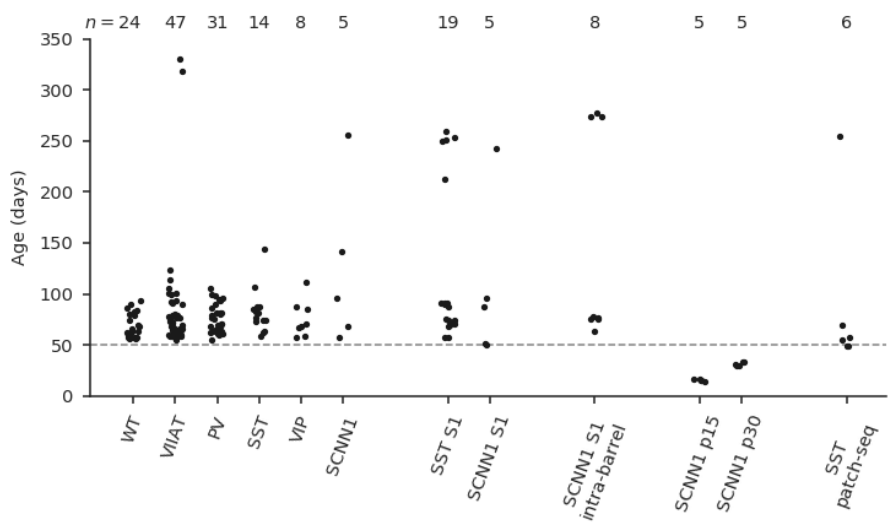

873

874 **Figure S1: Mice ages.** WT stands for wild type, all other abbreviations correspond to Cre lines.



**Morphology of labeled neurons for mouse Cre line**

| Cell type<br>Cre-line              | PYR              | BC                 | MC                | SC               | BPC               | NGC               | DBC               | HEC             | NMC              | Ste              |
|------------------------------------|------------------|--------------------|-------------------|------------------|-------------------|-------------------|-------------------|-----------------|------------------|------------------|
| <i>Viaat V1</i><br>(n=47)          | 11/245<br>(4.5%) | 88/245<br>(35.9%)  | 47/245<br>(19.2%) | 22/245<br>(8.9%) | 29/245<br>(11.8%) | 27/245<br>(11.0%) | 13/245<br>(5.3%)  | 8/245<br>(3.3%) | /                | /                |
| <i>PV V1</i><br>(n=31)             | /                | 126/163<br>(77.3%) | /                 | 15/163<br>(9.2%) | /                 | /                 | 20/163<br>(12.3%) | 2/163<br>(1.2%) | /                | /                |
| <i>VIP V1</i><br>(n=8)             | /                | /                  | /                 | /                | 28/28<br>(100%)   | /                 | /                 | /               | /                | /                |
| <i>SCNN1A V1 p15/20</i><br>(n=5)   | 29/29<br>(100%)  | /                  | /                 | /                | /                 | /                 | /                 | /               | /                | /                |
| <i>SCNN1A V1 p30/40</i><br>(n=5)   | 48/48<br>(100%)  | /                  | /                 | /                | /                 | /                 | /                 | /               | /                | /                |
| <i>SCNN1A V1 &gt;p 60</i><br>(n=5) | 30/30<br>(100%)  | /                  | /                 | /                | /                 | /                 | /                 | /               | /                | /                |
| <i>SOM V1</i><br>(n=14)            | /                | 5/61<br>(8.2%)     | 56/61<br>(91.8%)  | /                | /                 | /                 | /                 | /               | /                | /                |
| <i>SOM S1</i><br>(n=19)            | /                | 1/79<br>(1.3%)     | 2/79<br>(2.5%)    | /                | /                 | /                 | /                 | /               | 76/79<br>(96.2%) | /                |
| <i>SCNN1A S1</i><br>(n=5)          | 11/43<br>(25.6%) | /                  | /                 | /                | /                 | /                 | /                 | /               | /                | 32/43<br>(74.4%) |

875

876 **Figure S2: Morphological types of labeled neurons in different mouse Cre lines.**

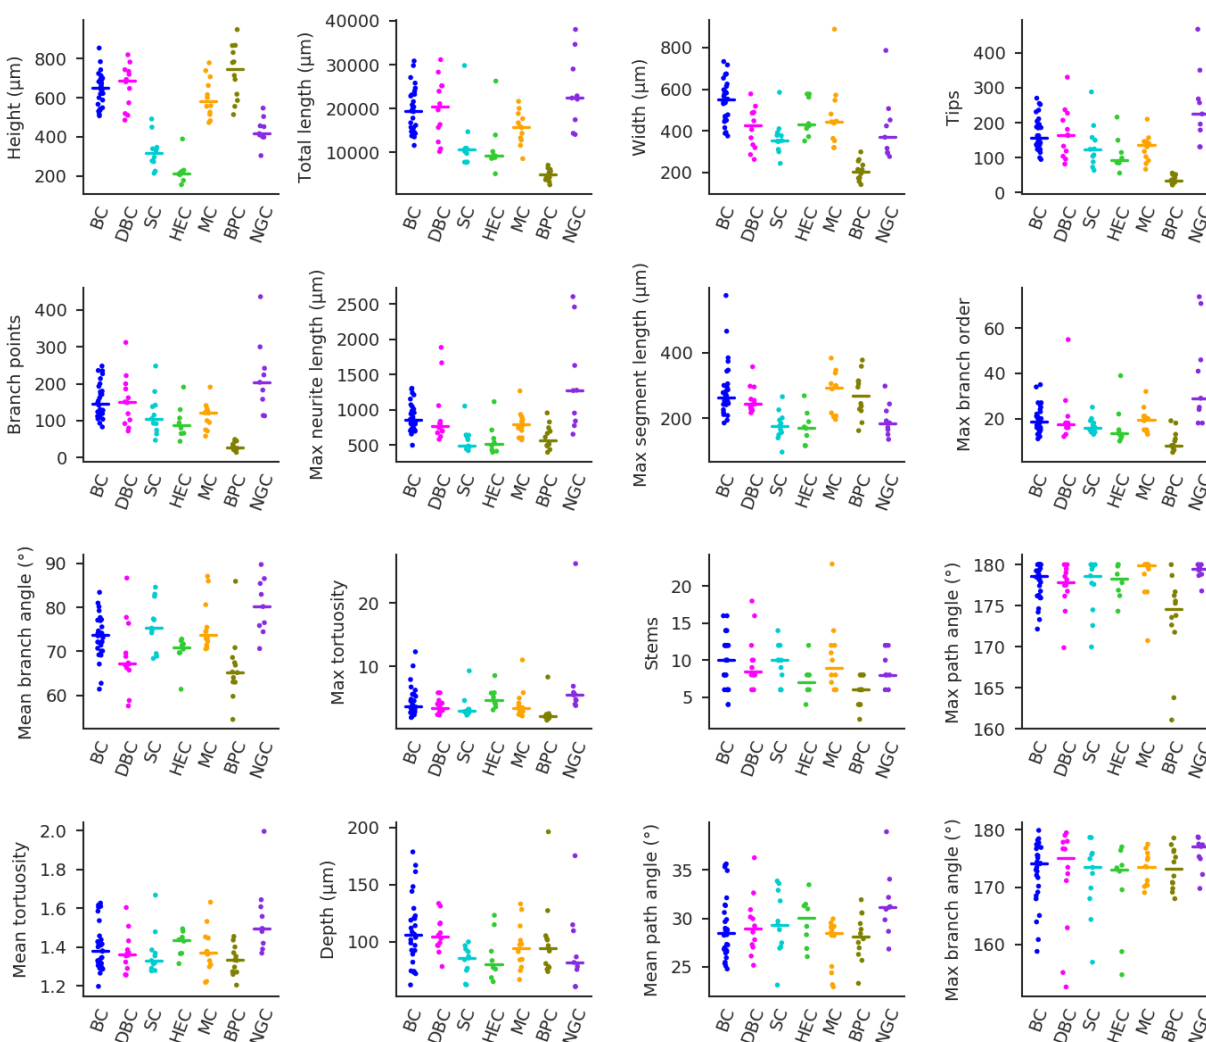

877  
 878 **Figure S3: Morphological features of neural cell types in V1 L4.** Each panel shows one of the 16  
 879 selected morphological summary statistics for  $n=92$  neurons: height (extent along the cortical depth), total  
 880 length of neurites, width (extent along the x-axis), number of tips, number of branch points, length of the  
 881 longest neurite from tip to soma, length of the longest segment, maximum branch order, mean branch  
 882 angle between two branches, maximum tortuosity, maximum path angle, number of stems extending from  
 883 the soma, mean tortuosity, depth (extent along the y-axis), mean path angle and maximum branch angle.  
 884 Features are sorted by how strongly they varied between cell types (from strongest to weakest), as  
 885 quantified by the Kruskal-Wallis test statistic. Horizontal lines show medians in each cell type.

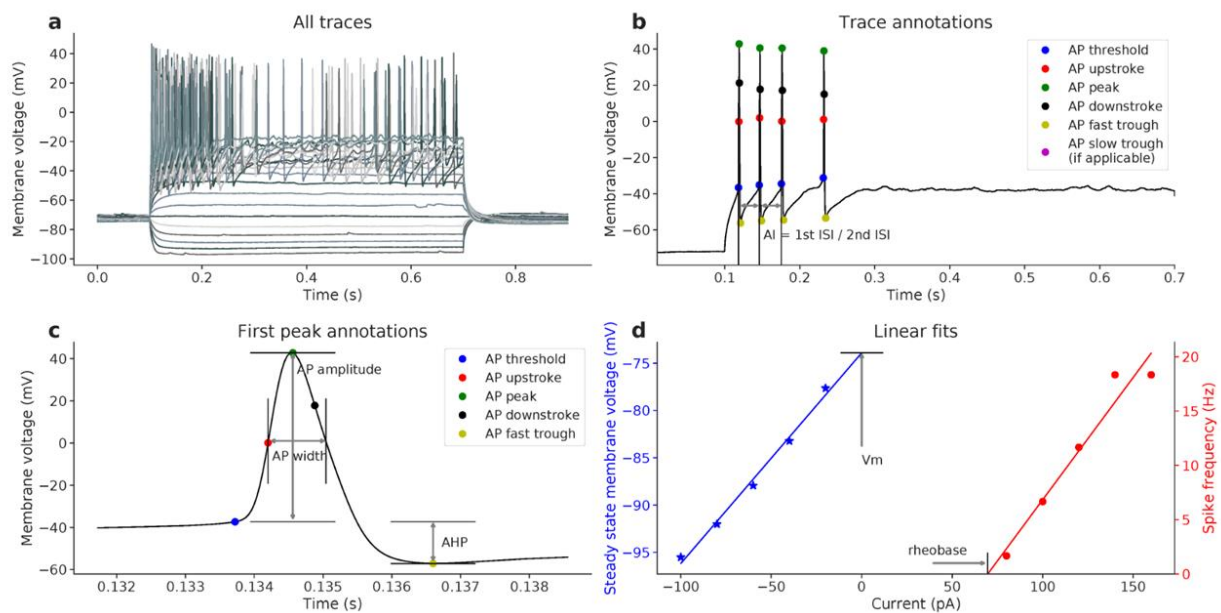

886

887 **Figure S4: Schematic of the electrophysiological features and the extraction algorithm.** All panels

888 show data from the same exemplary Martinotti cell. **(a)** Responses to the consecutive current clamp

889 stimulation currents. The maximum number of spikes elicited in 600 ms was 11. Hyperpolarizing currents

890 are used to compute sag ratio (1.3) and membrane time constant  $\tau$  (23.2 ms). **(b)** Zoom-in to one

891 particular trace in (a) showing trace annotations and AI (1.13). **(c)** Zoom-in to the first spike elicited by this

892 neuron. This action potential is used to compute AP threshold (-40.1 mV), AP amplitude (71.3 mV), AP

893 width (0.72 ms), AHP (-14.1 mV), ADP (6.6 mV), and latency of the first spike (78.7 ms) **(d)** Blue

894 regression line gives an estimate of resting membrane potential (-58.9 mV) and input resistance (235.8

895 M $\Omega$ ). Red regression line gives a rheobase estimate (40 pA).

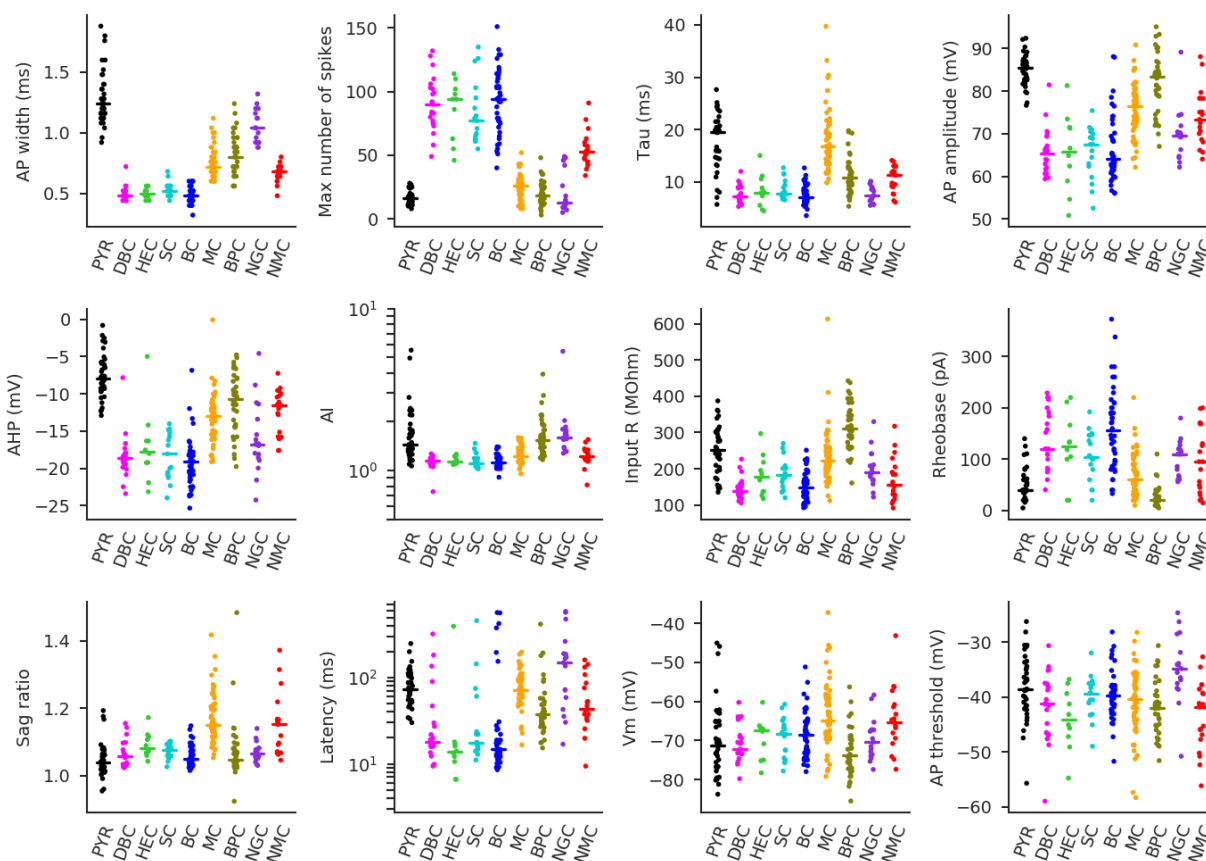

896

897 **Figure S5: Electrophysiological features of neural cell types.** All cell types apart from NMC (red) are  
 898 from V1 L4. NMC is from S1 L4. Each panel shows one of the 13 automatically extracted  
 899 electrophysiological features for  $n=254$  neurons: action potential (AP) width, maximum number of spikes  
 900 emitted during 600 ms of stimulation, membrane time constant tau, AP amplitude, afterhyperpolarization  
 901 (AHP) depth, input resistance, adaptation index, rheobase, sag ratio, latency of the first spike, membrane  
 902 potential, and AP threshold. Features are sorted by how strongly they varied between cell types (from the  
 903 most strongly to the least strongly), as quantified by the Kruskal-Wallis test statistic. Horizontal lines show  
 904 medians in each cell type. Afterdepolarization (ADP) height is not shown because its median was 0 for all  
 905 cell types. See Fig. S4 for explanations of the features.

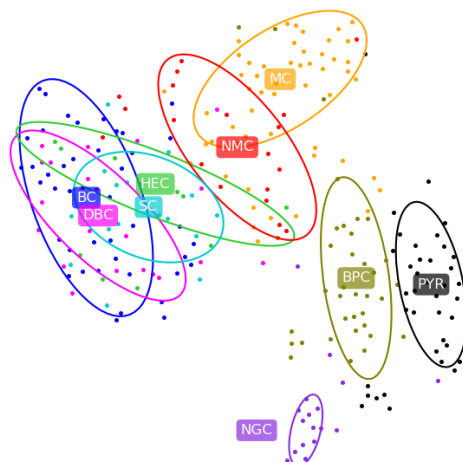

906

907 **Figure S6: 2D visualisation of cell types in the space of electrophysiological features using t-SNE.**

908 This figure is analogous to Fig. 2b, but includes  $n=19$  NMCs from S1 in addition to the  $n=235$  cells from

909 V1.

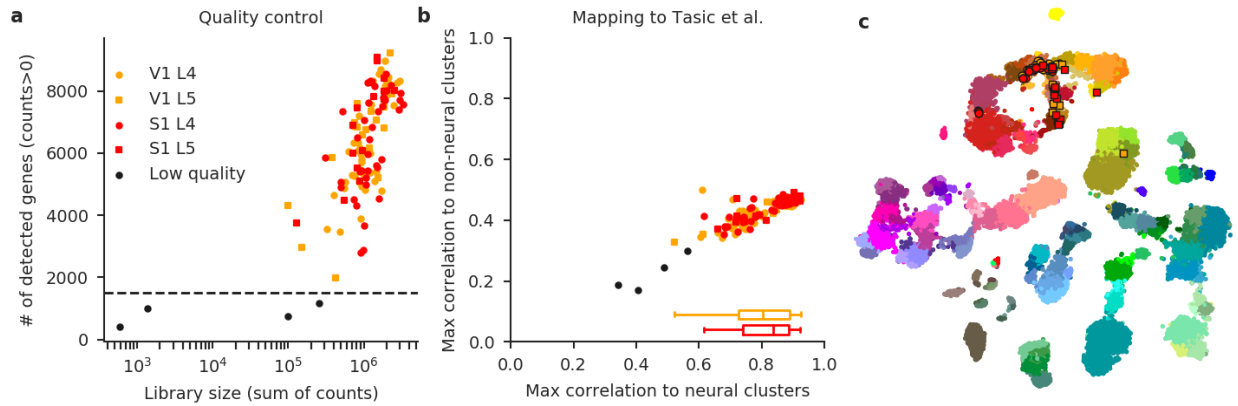

910

911 **Figure S7: Quality control of Patch-seq data including L5 cells. (a)** Distribution of library sizes (total  
912 sum of gene counts) and numbers of detected genes (number of positive counts) for each sequenced cell  
913 ( $n=118$ ). Four cells with less than 1500 genes detected were excluded. **(b)** For each cell, we found its  
914 maximal correlation to the cluster means of the Tasic et al. <sup>24</sup> dataset across all neural clusters ( $x$ -axis)  
915 and across all non-neural clusters ( $y$ -axis). Boxplots show distribution of maximal correlation for V1 and  
916 S1 cells (excluding the low quality cells). Correlations were not lower for S1 cells, despite the fact that the  
917 Tasic et al. dataset only contained data from V1 and ALM. **(c)** All  $n=114$  remaining cells were positioned  
918 on the t-SNE map of the Tasic et al. dataset. Three cells mapped to Pvalb clusters and one cell mapped  
919 to excitatory clusters.

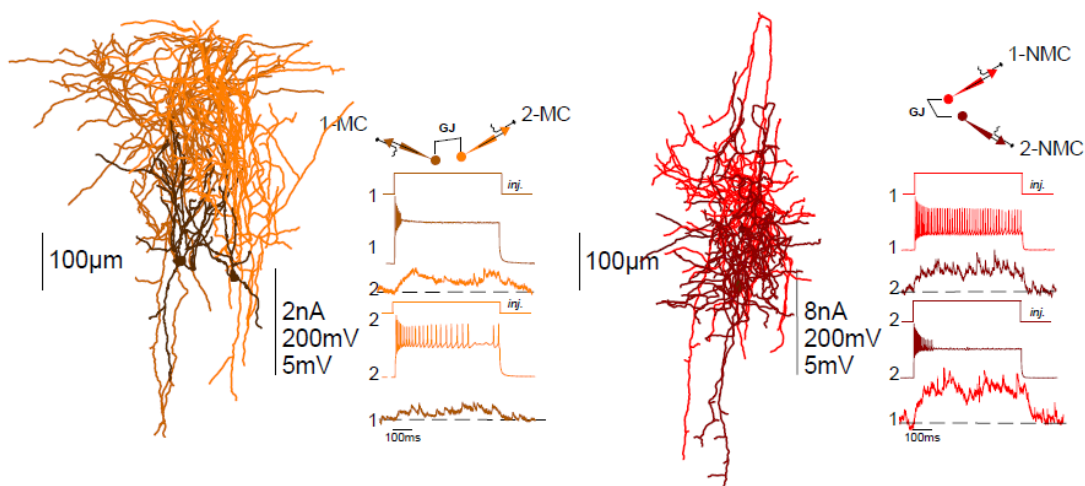

920

921

922 **Figure S8: Gap junctions are common between both MCs and NMCs.** Schematic representations of  
923 simultaneous recordings between L4 MCs in V1 (left) and L4 NMCs in S1 (right). Depolarizing current  
924 injections into either MC (left) or NMC (right) were transmitted to the other cell, confirming electrical  
925 coupling. The percentage of gap junctions was 23.5% in V1 (8/34) and 30.7% in S1 (8/26).

| POST \ PRE | PYR                                 | BC                 | MC                 |
|------------|-------------------------------------|--------------------|--------------------|
| PYR        | $0.75 \pm 0.13$ mV<br>PPR=75.6±5.1% | $0.68 \pm 0.07$ mV | $0.50 \pm 0.07$ mV |
| BC         | $1.17 \pm 0.23$ mV<br>PPR=85.8±6.5% | $0.77 \pm 0.05$ mV | $0.59 \pm 0.09$ mV |
| MC         | /                                   | $0.53 \pm 0.15$ mV | /                  |

|        | PYR-PYR                             |
|--------|-------------------------------------|
| p15/20 | $0.69 \pm 0.15$ mV<br>PPR=78.9±8.7% |
| p30/40 | $0.58 \pm 0.19$ mV<br>PPR=73.2±6.6% |
| adult  | $0.75 \pm 0.13$ mV<br>PPR=75.6±5.1% |

  

| POST \ PRE | EXC                                  | NMCs               |
|------------|--------------------------------------|--------------------|
| EXC        | $0.99 \pm 0.34$ mV<br>PPR=87.2±4.0%  | $0.38 \pm 0.12$ mV |
| NMC        | $0.53 \pm 0.16$ mV<br>PPR=139.±17.0% | $0.19 \pm 0.05$ mV |

|     | EXC                                 |
|-----|-------------------------------------|
| EXC | $0.32 \pm 0.09$ mV<br>PPR=69.1±4.6% |

926

927 **Figure S9. Amplitudes of u(E)psc and (I)PSC.**



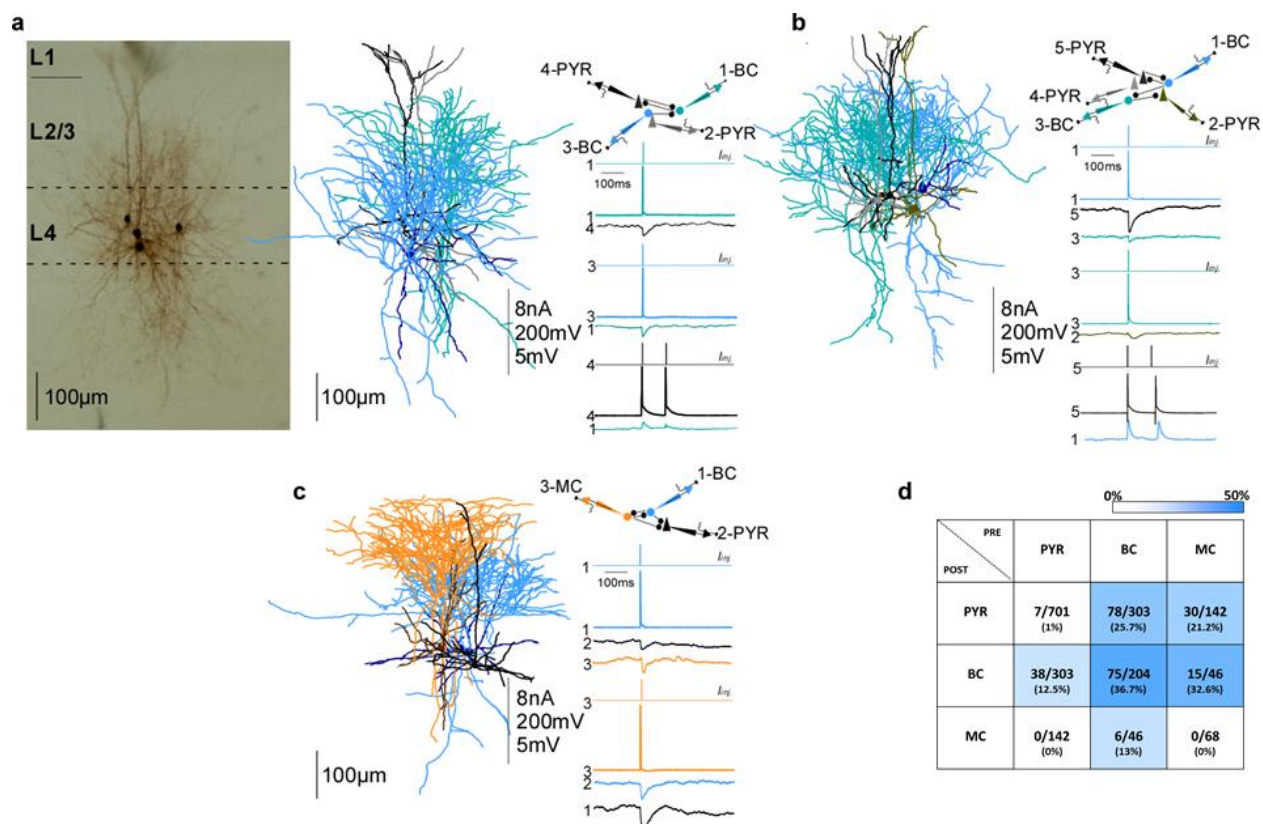

928

929

930 **Figure S10: Connectivity between L4 PYRs, BCs, and MCs in V1. (a)** On the left: Example of  
 931 morphological recovery of four neurons. Recorded neurons were close to each other (generally less than  
 932 250µm). On the right: connection diagram of the same neurons, including two BCs and two PYRs, and  
 933 their reconstructed morphology. Vertical scale bar indicates: amplitudes of injected current in nA,  
 934 amplitude of APs in mV and amplitude of uEPSP or uIPSP in mV. **(b)** Connections between five  
 935 simultaneously recorded neurons including three PYRs and two BCs. **(c)** Connections between three  
 936 simultaneously recorded neurons including one PYR, one BC and one MC. **(d)** Color coded connectivity  
 937 matrix showing the connection probabilities between PYRs, BCs and MCs computed as a fraction of all  
 938 tested connections. Average of uEPSP and uIPSP as well as PPR are reported in Fig. S7.

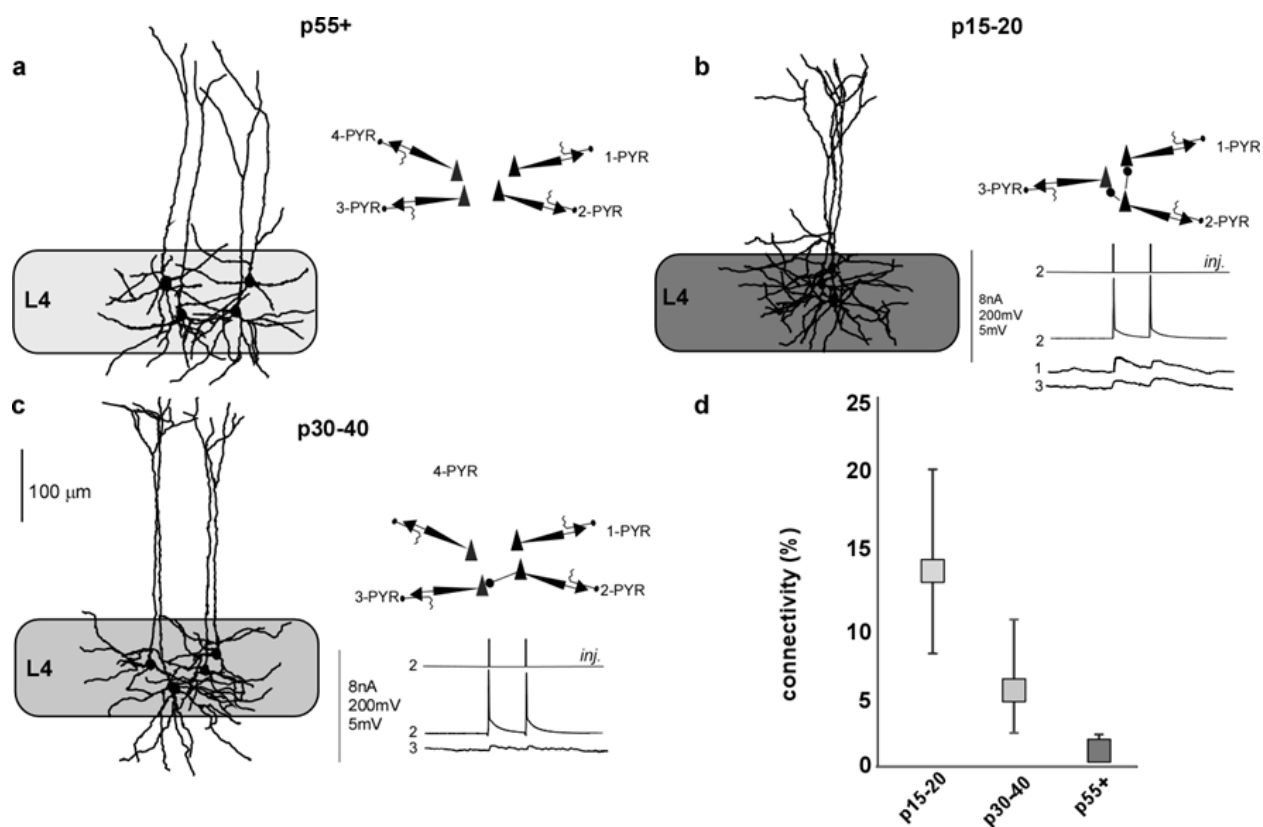

939

940

941 **Figure S11: Connectivity between L4 PYRs in V1 at different ages. (a-c)** Examples of simultaneously

942 recorded L4 neurons in P55+ (A), P15-20 (B), and P30-40 (C) mice. **(d)** Connectivity probability between

943 PYRs at different ages: 13.2% in P15-20 (15/114), 5.1% in P30-40 (8/156), and 1.0% in P55+ with

944 median age p71 (7/701). Error bars are 95% Clopper-Pearson confidence intervals.

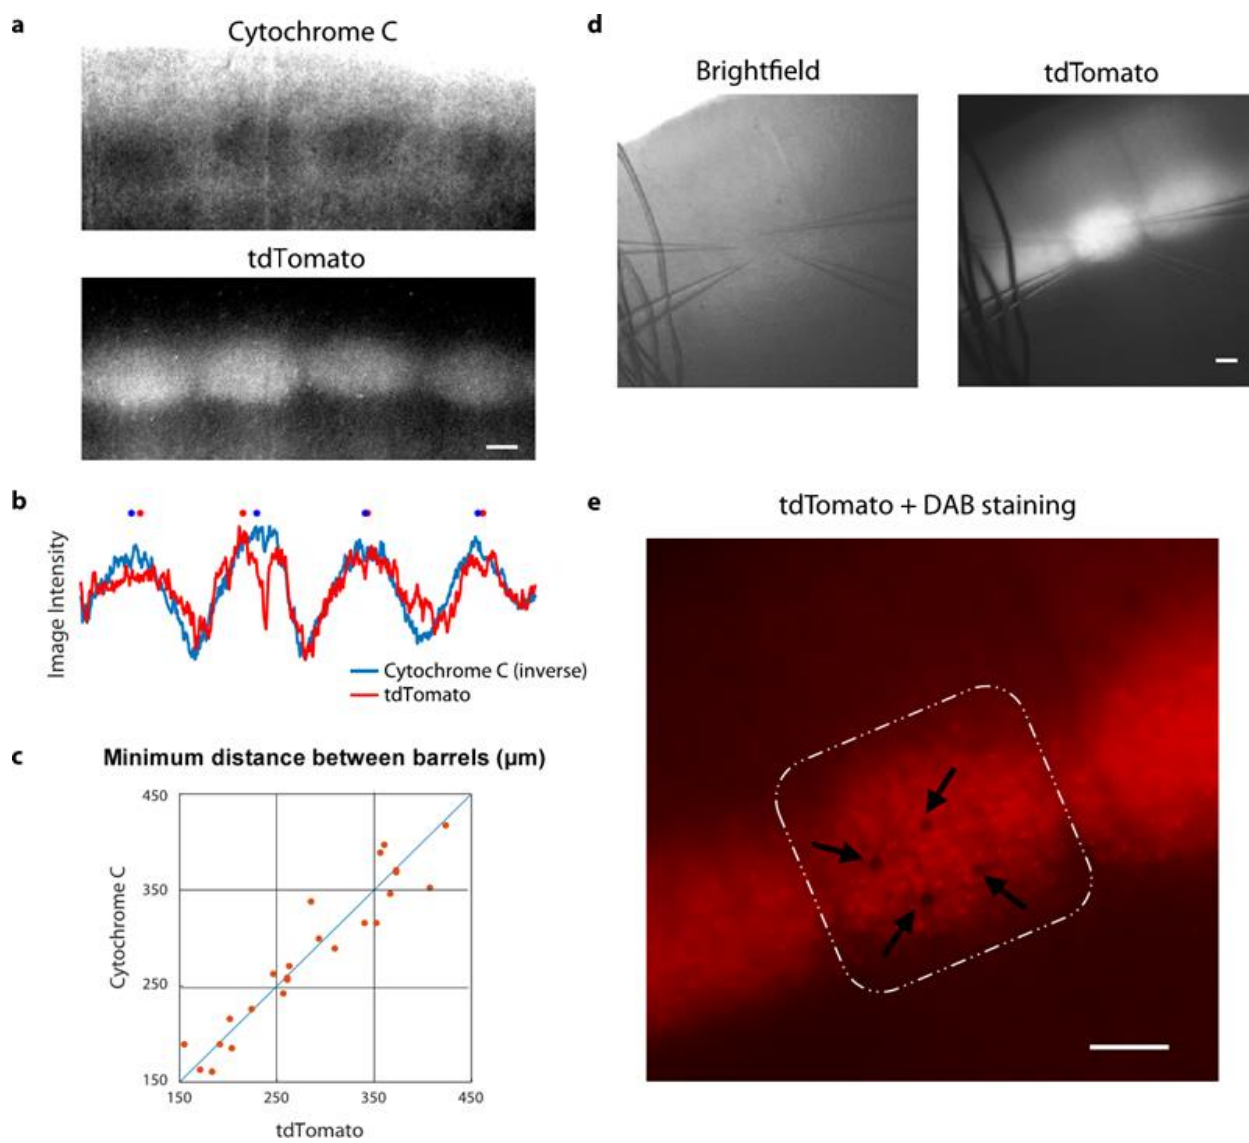

945

946

947 **Figure S12: Identification of L4 barrels in S1 for intra-barrel recordings:** (a) One exemplary slice  
948 showing barrels in L4 of somatosensory cortex identified by either cytochrome C staining (above) or by  
949 tdTomato fluorescence (below) in Scnn1a-Cre mouse. (b) Average intensity for the Cytochrome C and  
950 tdTomato images shown in A. Note that the traces shown here are normalized (between 0 and 1) and  
951 high-pass filtered but not smoothed. The signal of the cytochrome C was inverted for easier comparison  
952 to the fluorescence trace. The barrel centers, indicated with asterisks, were detected as the peaks of  
953 intensity of the smoothed traces. (c) Distances between adjacent barrels detected with either Cytochrome  
954 C or tdTomato. Summary across  $n=7$  slices. (d) An example of intra-barrel quadruple recording. Left:

955 under brightfield. Right: tdTomato signal. **(e)** Diaminobenzidine (DAB) staining confirmed the intra-barrel  
956 localization of the recorded neurons. All scale bars represent 100 $\mu$ m.

## 957 **Acknowledgements**

958 We thank Alex Naka for comments and suggestions. Supported by the Intelligence Advanced  
959 Research Projects Activity (IARPA) via Department of Interior/Interior Business Center  
960 (DoI/IBC) contract number D16PC00003. The U.S. Government is authorized to reproduce and  
961 distribute reprints for Governmental purposes notwithstanding any copyright annotation thereon.  
962 The views and conclusions contained herein are those of the authors and should not be  
963 interpreted as necessarily representing the official policies or endorsements, either expressed or  
964 implied, of IARPA, DoI/IBC, or the U.S. Government.

965

966 This work was also supported by the German Research Foundation (BE5601/4-1, SFB1233 -  
967 276693517) and the German Excellence Strategy (EXC 2064 - 390727645), the Federal  
968 Ministry of Education and Research (FKZ 01GQ1601) and the National Institute of Mental  
969 Health and the National Institute of Neurological Disorders And Stroke under Award Number  
970 U19MH114830. The content is solely the responsibility of the authors and does not necessarily  
971 represent the official views of the National Institutes of Health.

972

## 973 **Author contributions**

974 FS and XJ performed electrophysiological recordings and manual neuronal reconstructions. DK  
975 supervised data analysis. JC created full-length cDNA libraries and aided in morphological  
976 recovery. LH prepared the full-length cDNA libraries for sequencing and performed sequencing  
977 and initial bioinformatics analysis under the supervision of RS. ZT and SP sustained animals'  
978 colonies and provided experimental support. SL did the morphological data analysis. YB did the  
979 electrophysiological data analysis. DK did the transcriptomic data analysis. FS, DK, SL, YB, and  
980 EF analyzed the data and produced the figures. FS, DK, SS, CRC, PB, EF, and AST wrote the

981 manuscript. AST, XJ, SP, and PB discussed and oversaw analysis and results. All authors

982 revised the manuscript.

## 983 References

- 984 1. Simons, D. J. & Woolsey, T. A. Morphology of Golgi-Cox-impregnated barrel neurons in rat  
985 Sml cortex. *J. Comp. Neurol.* **230**, 119–132 (1984).
- 986 2. Feldmeyer, D., Egger, V., Lübke, J. & Sakmann, B. Reliable synaptic connections between  
987 pairs of excitatory layer 4 neurones within a single ‘barrel’ of developing rat somatosensory  
988 cortex. *The Journal of Physiology* **521**, 169–190 (1999).
- 989 3. Petersen, C. C. H. & Sakmann, B. The Excitatory Neuronal Network of Rat Layer 4 Barrel  
990 Cortex. *J. Neurosci.* **20**, 7579–7586 (2000).
- 991 4. Schubert, D., Kötter, R., Zilles, K., Luhmann, H. J. & Staiger, J. F. Cell type-specific circuits  
992 of cortical layer IV spiny neurons. *J. Neurosci.* **23**, 2961–2970 (2003).
- 993 5. Staiger, J. F. Functional Diversity of Layer IV Spiny Neurons in Rat Somatosensory Cortex:  
994 Quantitative Morphology of Electrophysiologically Characterized and Biocytin Labeled  
995 Cells. *Cereb. Cortex* **14**, 690–701 (2004).
- 996 6. Woolsey, T. A., Dierker, M. L. & Wann, D. F. Mouse Sml cortex: qualitative and quantitative  
997 classification of golgi-impregnated barrel neurons. *Proc. Natl. Acad. Sci. U. S. A.* **72**, 2165–  
998 2169 (1975).
- 999 7. Callaway, E. M. & Borrell, V. Developmental sculpting of dendritic morphology of layer 4  
1000 neurons in visual cortex: influence of retinal input. *J. Neurosci.* **31**, 7456–7470 (2011).
- 1001 8. Simi, A. & Studer, M. Developmental genetic programs and activity-dependent mechanisms  
1002 instruct neocortical area mapping. *Curr. Opin. Neurobiol.* **53**, 96–102 (2018).
- 1003 9. Tremblay, R., Lee, S. & Rudy, B. GABAergic Interneurons in the Neocortex: From Cellular  
1004 Properties to Circuits. *Neuron* **91**, 260–292 (2016).
- 1005 10. Koelbl, C., Helmstaedter, M., Lübke, J. & Feldmeyer, D. A Barrel-Related Interneuron in  
1006 Layer 4 of Rat Somatosensory Cortex with a High Intrabarrel Connectivity. *Cereb. Cortex*  
1007 **25**, 713–725 (2013).

- 1008 11. Emmenegger, V., Qi, G., Wang, H. & Feldmeyer, D. Morphological and Functional  
1009 Characterization of Non-fast-Spiking GABAergic Interneurons in Layer 4 Microcircuitry of  
1010 Rat Barrel Cortex. *Cereb. Cortex* **28**, 1439–1457 (2018).
- 1011 12. Yavorska, I. & Wehr, M. Somatostatin-Expressing Inhibitory Interneurons in Cortical  
1012 Circuits. *Front. Neural Circuits* **10**, (2016).
- 1013 13. Ma, Y., Hu, H., Berrebi, A. S., Mathers, P. H. & Agmon, A. Distinct subtypes of  
1014 somatostatin-containing neocortical interneurons revealed in transgenic mice. *J. Neurosci.*  
1015 **26**, 5069–5082 (2006).
- 1016 14. Xu, H., Jeong, H.-Y., Tremblay, R. & Rudy, B. Neocortical somatostatin-expressing  
1017 GABAergic interneurons disinhibit the thalamorecipient layer 4. *Neuron* **77**, 155–167  
1018 (2013).
- 1019 15. Cruikshank, S. J., Lewis, T. J. & Connors, B. W. Synaptic basis for intense thalamocortical  
1020 activation of feedforward inhibitory cells in neocortex. *Nat. Neurosci.* **10**, 462–468 (2007).
- 1021 16. Beierlein, M., Gibson, J. R. & Connors, B. W. Two Dynamically Distinct Inhibitory Networks  
1022 in Layer 4 of the Neocortex. *J. Neurophysiol.* **90**, 2987–3000 (2003).
- 1023 17. Higley, M. J. & Contreras, D. Balanced excitation and inhibition determine spike timing  
1024 during frequency adaptation. *J. Neurosci.* **26**, 448–457 (2006).
- 1025 18. Gabernet, L., Jadhav, S. P., Feldman, D. E., Carandini, M. & Scanziani, M. Somatosensory  
1026 Integration Controlled by Dynamic Thalamocortical Feed-Forward Inhibition. *Neuron* **48**,  
1027 315–327 (2005).
- 1028 19. Kloc, M. & Maffei, A. Target-specific properties of thalamocortical synapses onto layer 4 of  
1029 mouse primary visual cortex. *J. Neurosci.* **34**, 15455–15465 (2014).
- 1030 20. Cruikshank, S. J., Urabe, H., Nurmikko, A. V. & Connors, B. W. Pathway-specific  
1031 feedforward circuits between thalamus and neocortex revealed by selective optical  
1032 stimulation of axons. *Neuron* **65**, 230–245 (2010).
- 1033 21. Ji, X.-Y. *et al.* Thalamocortical Innervation Pattern in Mouse Auditory and Visual Cortex:



- 1034 Laminar and Cell-Type Specificity. *Cereb. Cortex* **26**, 2612–2625 (2016).
- 1035 22. Kawaguchi, Y. & Kubota, Y. GABAergic cell subtypes and their synaptic connections in rat  
1036 frontal cortex. *Cereb. Cortex* **7**, 476–486 (1997).
- 1037 23. Ma, Y., Hu, H. & Agmon, A. Short-term plasticity of unitary inhibitory-to-inhibitory synapses  
1038 depends on the presynaptic interneuron subtype. *J. Neurosci.* **32**, 983–988 (2012).
- 1039 24. Tasic, B. *et al.* Shared and distinct transcriptomic cell types across neocortical areas.  
1040 *Nature* **563**, 72–78 (2018).
- 1041 25. Nowakowski, T. J. *et al.* Regulation of cell-type-specific transcriptomes by microRNA  
1042 networks during human brain development. *Nat. Neurosci.* **21**, 1784–1792 (2018).
- 1043 26. Peters, A. & Kara, D. A. The neuronal composition of area 17 of rat visual cortex. I. The  
1044 pyramidal cells. *J. Comp. Neurol.* **234**, 218–241 (1985).
- 1045 27. Xu, X. *et al.* Primary visual cortex shows laminar-specific and balanced circuit organization  
1046 of excitatory and inhibitory synaptic connectivity. *J. Physiol.* **594**, 1891–1910 (2016).
- 1047 28. Jiang, X. *et al.* Principles of connectivity among morphologically defined cell types in adult  
1048 neocortex. *Science* **350**, aac9462–aac9462 (2015).
- 1049 29. Cadwell, C. R. *et al.* Multimodal profiling of single-cell morphology, electrophysiology, and  
1050 gene expression using Patch-seq. *Nat. Protoc.* **12**, 2531–2553 (2017).
- 1051 30. Cadwell, C. R. *et al.* Electrophysiological, transcriptomic and morphologic profiling of single  
1052 neurons using Patch-seq. *Nat. Biotechnol.* **34**, 199–203 (2016).
- 1053 31. Fuzik, J. *et al.* Integration of electrophysiological recordings with single-cell RNA-seq data  
1054 identifies neuronal subtypes. *Nat. Biotechnol.* **34**, 175–183 (2016).
- 1055 32. Ramaswamy, S. & Markram, H. Anatomy and physiology of the thick-tufted layer 5  
1056 pyramidal neuron. *Front. Cell. Neurosci.* **9**, 233 (2015).
- 1057 33. Romand, S., Wang, Y., Toledo-Rodriguez, M. & Markram, H. Morphological Development  
1058 of Thick-Tufted Layer V Pyramidal Cells in the Rat Somatosensory Cortex. *Front.*  
1059 *Neuroanat.* **5**, (2011).

- 1060 34. Kim, E. J., Juavinett, A. L., Kyubwa, E. M., Jacobs, M. W. & Callaway, E. M. Three Types of  
1061 Cortical Layer 5 Neurons That Differ in Brain-wide Connectivity and Function. *Neuron* **88**,  
1062 1253–1267 (2015).
- 1063 35. Xue, M., Atallah, B. V. & Scanziani, M. Equalizing excitation–inhibition ratios across visual  
1064 cortical neurons. *Nature* **511**, 596–600 (2014).
- 1065 36. Harris, J. A. *et al.* Anatomical characterization of Cre driver mice for neural circuit mapping  
1066 and manipulation. *Front. Neural Circuits* **8**, 76 (2014).
- 1067 37. Chao, H. T. *et al.* Dysfunction in GABA signalling mediates autism-like stereotypies and  
1068 Rett syndrome phenotypes. *Nature* **468**, 263–269 (2010).
- 1069 38. Markram, H. *et al.* Interneurons of the neocortical inhibitory system. *Nat. Rev. Neurosci.* **5**,  
1070 793–807 (2004).
- 1071 39. Petilla Interneuron Nomenclature Group *et al.* Petilla terminology: nomenclature of features  
1072 of GABAergic interneurons of the cerebral cortex. *Nat. Rev. Neurosci.* **9**, 557–568 (2008).
- 1073 40. DeFelipe, J. *et al.* New insights into the classification and nomenclature of cortical  
1074 GABAergic interneurons. *Nat. Rev. Neurosci.* **14**, 202–216 (2013).
- 1075 41. Hu, H., Cavendish, J. Z. & Agmon, A. Not all that glitters is gold: off-target recombination in  
1076 the somatostatin–IRES-Cre mouse line labels a subset of fast-spiking interneurons.  
1077 *Frontiers in Neural Circuits* **7**, (2013).
- 1078 42. Reimer, J. *et al.* Pupil fluctuations track fast switching of cortical states during quiet  
1079 wakefulness. *Neuron* **84**, 355–362 (2014).
- 1080 43. Latus, S., Kobak, D. & Berens, P. A systematic evaluation of neural morphology  
1081 representations for cell type discrimination. *bioRxiv* (2019). doi:10.1101/591370
- 1082 44. Paul, A. *et al.* Transcriptional Architecture of Synaptic Communication Delineates  
1083 GABAergic Neuron Identity. *Cell* **171**, 522–539.e20 (2017).
- 1084 45. Naka, A. *et al.* Complementary networks of cortical somatostatin interneurons enforce layer  
1085 specific control. (2018). doi:10.1101/456574

- 1086 46. Kobak, D., Weis, M. A. & Berens, P. Sparse reduced-rank regression for exploratory  
1087 visualization of single cell patch-seq recordings. (2018). doi:10.1101/302208
- 1088 47. Kobak, D. & Berens, P. The art of using t-SNE for single-cell transcriptomics. (2018).  
1089 doi:10.1101/453449
- 1090 48. Pfeffer, C. K., Xue, M., He, M., Huang, Z. J. & Scanziani, M. Inhibition of inhibition in visual  
1091 cortex: the logic of connections between molecularly distinct interneurons. *Nat. Neurosci.*  
1092 **16**, 1068–1076 (2013).
- 1093 49. Galarreta, M. & Hestrin, S. Electrical synapses between GABA-releasing interneurons. *Nat.*  
1094 *Rev. Neurosci.* **2**, 425–433 (2001).
- 1095 50. Markram, H., Lübke, J., Frotscher, M., Roth, A. & Sakmann, B. Physiology and anatomy of  
1096 synaptic connections between thick tufted pyramidal neurones in the developing rat  
1097 neocortex. *J. Physiol.* **500**, 409–440 (1997).
- 1098 51. Song, S., Sjöström, P. J., Reigl, M., Nelson, S. & Chklovskii, D. B. Correction: Highly  
1099 Nonrandom Features of Synaptic Connectivity in Local Cortical Circuits. *PLoS Biol.* **3**, e350  
1100 (2005).
- 1101 52. Seeman, S. C. *et al.* Sparse recurrent excitatory connectivity in the microcircuit of the adult  
1102 mouse and human cortex. *Elife* **7**, (2018).
- 1103 53. Gainey, M. A., Aman, J. W. & Feldman, D. E. Rapid Disinhibition by Adjustment of PV  
1104 Intrinsic Excitability during Whisker Map Plasticity in Mouse S1. *J. Neurosci.* **38**, 4749–4761  
1105 (2018).
- 1106 54. Lefort, S., Tomm, C., Floyd Sarria, J.-C. & Petersen, C. C. H. The excitatory neuronal  
1107 network of the C2 barrel column in mouse primary somatosensory cortex. *Neuron* **61**, 301–  
1108 316 (2009).
- 1109 55. Gibson, J. R., Beierlein, M. & Connors, B. W. Two networks of electrically coupled inhibitory  
1110 neurons in neocortex. *Nature* **402**, 75–79 (1999).
- 1111 56. Sáez, I. & Friedlander, M. J. Synaptic output of individual layer 4 neurons in guinea pig

- 1112 visual cortex. *J. Neurosci.* **29**, 4930–4944 (2009).
- 1113 57. Feldmeyer, D., Roth, A. & Sakmann, B. Monosynaptic connections between pairs of spiny  
1114 stellate cells in layer 4 and pyramidal cells in layer 5A indicate that lemniscal and  
1115 paralemniscal afferent pathways converge in the infragranular somatosensory cortex. *J.*  
1116 *Neurosci.* **25**, 3423–3431 (2005).
- 1117 58. Lund, J. S., Henry, G. H., MacQueen, C. L. & Harvey, A. R. Anatomical organization of the  
1118 primary visual cortex (area 17) of the cat. A comparison with area 17 of the macaque  
1119 monkey. *J. Comp. Neurol.* **184**, 599–618 (1979).
- 1120 59. Saint Marie, R. L. & Peters, A. The morphology and synaptic connections of spiny stellate  
1121 neurons in monkey visual cortex (area 17): a Golgi-electron microscopic study. *J. Comp.*  
1122 *Neurol.* **233**, 213–235 (1985).
- 1123 60. Gouwens, N. W. *et al.* Classification of electrophysiological and morphological types in  
1124 mouse visual cortex. *bioRxiv* 368456 (2018). doi:10.1101/368456
- 1125 61. Nigro, M. J., Hashikawa-Yamasaki, Y. & Rudy, B. Diversity and Connectivity of Layer 5  
1126 Somatostatin-Expressing Interneurons in the Mouse Barrel Cortex. *J. Neurosci.* **38**, 1622–  
1127 1633 (2018).
- 1128 62. Zeng, H. & Sanes, J. R. Neuronal cell-type classification: challenges, opportunities and the  
1129 path forward. *Nat. Rev. Neurosci.* **18**, 530–546 (2017).
- 1130 63. Larkum, M. A cellular mechanism for cortical associations: An organizing principle for the  
1131 cerebral cortex. *Trends Neurosci.* **36**, 141–151 (2013).
- 1132 64. Lovett-Barron, M. *et al.* Regulation of neuronal input transformations by tunable dendritic  
1133 inhibition. *Nat. Neurosci.* **15**, 423–30, S1–3 (2012).
- 1134 65. Lodato, S. *et al.* Excitatory Projection Neuron Subtypes Control the Distribution of Local  
1135 Inhibitory Interneurons in the Cerebral Cortex. *Neuron* **69**, 763–779 (2011).
- 1136 66. Wong, F. K. *et al.* Pyramidal cell regulation of interneuron survival sculpts cortical networks.  
1137 *Nature* **557**, 668–673 (2018).

- 1138 67. Kapfer, C., Glickfeld, L. L., Atallah, B. V. & Scanziani, M. Supralinear increase of recurrent  
1139 inhibition during sparse activity in the somatosensory cortex. *Nat. Neurosci.* **10**, 743–753  
1140 (2007).
- 1141 68. Silberberg, G. & Markram, H. Disynaptic inhibition between neocortical pyramidal cells  
1142 mediated by Martinotti cells. *Neuron* **53**, 735–746 (2007).
- 1143 69. Adesnik, H., Bruns, W., Taniguchi, H., Huang, Z. J. & Scanziani, M. A neural circuit for  
1144 spatial summation in visual cortex. *Nature* **490**, 226–231 (2012).
- 1145 70. Jiang, X. *et al.* Response to Comment on ‘Principles of connectivity among morphologically  
1146 defined cell types in adult neocortex’. *Science* **353**, 1108 (2016).
- 1147 71. Barth, A. *et al.* Comment on ‘Principles of connectivity among morphologically defined cell  
1148 types in adult neocortex’. *Science* **353**, 1108 (2016).
- 1149 72. Levy, R. B. & Reyes, A. D. Spatial Profile of Excitatory and Inhibitory Synaptic Connectivity  
1150 in Mouse Primary Auditory Cortex. *Journal of Neuroscience* **32**, 5609–5619 (2012).
- 1151 73. Qi, G., Radnikow, G. & Feldmeyer, D. Electrophysiological and Morphological  
1152 Characterization of Neuronal Microcircuits in Acute Brain Slices Using Paired Patch-Clamp  
1153 Recordings. *J. Vis. Exp.* 21–27 (2015).
- 1154 74. Marx, M., Günter, R. H., Hucko, W., Radnikow, G. & Feldmeyer, D. Improved biocytin  
1155 labeling and neuronal 3D reconstruction. *Nat. Protoc.* **7**, 394–407 (2012).
- 1156 75. Ramsköld, D., Wang, E. T., Burge, C. B. & Sandberg, R. An abundance of ubiquitously  
1157 expressed genes revealed by tissue transcriptome sequence data. *PLoS Comput. Biol.* **5**,  
1158 e1000598 (2009).
- 1159 76. Jefferis, G. S. X. E. *et al.* Comprehensive maps of *Drosophila* higher olfactory centers:  
1160 spatially segregated fruit and pheromone representation. *Cell* **128**, 1187–1203 (2007).
- 1161 77. Friedman, J., Hastie, T. & Tibshirani, R. Regularization Paths for Generalized Linear  
1162 Models via Coordinate Descent. *J. Stat. Softw.* **33**, (2010).
- 1163 78. Andrews, T. S. & Hemberg, M. Dropout-based feature selection for scRNASeq. *bioRxiv*

- 1164 065094 (2018). doi:10.1101/065094
- 1165 79. Le Bon-Jego, M. & Yuste, R. Persistently active, pacemaker-like neurons in neocortex.  
1166 *Front. Neurosci.* **1**, 123–129 (2007).
- 1167 80. Buchanan, K. A. *et al.* Target-Specific Expression of Presynaptic NMDA Receptors in  
1168 Neocortical Microcircuits. *Neuron* **75**, 451–466 (2012).
- 1169 81. Wang, Y. *et al.* Anatomical, physiological and molecular properties of Martinotti cells in the  
1170 somatosensory cortex of the juvenile rat. *J. Physiol.* **561**, 65–90 (2004).
- 1171 82. Wang, Y., Gupta, A., Toledo-Rodriguez, M., Wu, C. Z. & Markram, H. Anatomical,  
1172 physiological, molecular and circuit properties of nest basket cells in the developing  
1173 somatosensory cortex. *Cereb. Cortex* **12**, 395–410 (2002).
- 1174 83. Muñoz, W., Tremblay, R. & Rudy, B. Channelrhodopsin-Assisted Patching: InVivo  
1175 Recording of Genetically and Morphologically Identified Neurons throughout the Brain. *Cell*  
1176 *Rep.* **9**, 2304–2316 (2014).
